# Supplementary material for: Density functionals with asymptotic-potential corrections are required for the simulation of spectroscopic properties of materials
Source: Royal Society of Chemistry journal article supplement (doi:10.1039/d1sc03738b), 2021-12-31
Supplement: d1sc03738b1.pdf [file d1sc03738b1.pdf]

# Density functionals with asymptotic-potential corrections are required for the simulation of spectroscopic properties of materials.

Musen Li,<sup>a</sup> Rika Kobayashi,<sup>b</sup> Roger D. Amos,<sup>b</sup> Michael J. Ford<sup>c</sup> and Jeffrey R. Reimers<sup>a,c</sup>

<sup>a</sup> International Centre for Quantum and Molecular Structures and Department of Physics, Shanghai University, Shanghai 200444, China.

<sup>b</sup> ANU Supercomputer Facility, Leonard Huxley Bldg. 56, Mills Rd, Canberra, ACT, 2601, Australia.

<sup>c</sup> University of Technology Sydney, School of Mathematical and Physical Sciences, Ultimo, New South Wales 2007, Australia.

Email: [Jeffrey.Reimers@uts.edu.au](mailto:Jeffrey.Reimers@uts.edu.au), [Mike.Ford@uts.edu.au](mailto:Mike.Ford@uts.edu.au)

## Electronic Supporting Information

**Table S1.** Comparison of observed and calculated lattice parameters (in Å).

| Material                       | obs.                    | CAM-B3LYP <sup>1</sup> | B3LYP <sup>b</sup> | HSE06 <sup>1-3</sup> | DD-RSC-CAM <sup>2</sup> | PBE <sup>2,3</sup> | SCAN <sup>4</sup> |
|--------------------------------|-------------------------|------------------------|--------------------|----------------------|-------------------------|--------------------|-------------------|
| Al <sub>2</sub> O <sub>3</sub> | 4.7589 <sup>5</sup>     | 4.762 <sup>a</sup>     |                    |                      |                         |                    |                   |
| AlAs                           | 5.6614 <sup>6</sup>     | 5.664 <sup>a</sup>     |                    |                      |                         |                    |                   |
| AlN-wz                         | 3.1111 <sup>6</sup>     | 3.099 <sup>a</sup>     |                    |                      |                         |                    | 3.090             |
| AlP-zb                         | 5.451 <sup>3</sup>      | 5.458 <sup>a</sup>     |                    | 2.543                |                         |                    | 5.482             |
| BN                             | 2.5044 <sup>7</sup>     | 2.506                  | 2.493              | 2.491                | 2.534                   | 2.543              | 2.551             |
| BP                             | 4.5383 <sup>6</sup>     | 4.538 <sup>a</sup>     |                    | 4.421                | 4.527                   | 4.521              |                   |
| C                              | 3.5669 <sup>8</sup>     | 3.5671                 | 3.559              | 3.548                | 3.552                   | 3.548              | 3.556             |
| CaO                            | 4.811 <sup>6</sup>      | 4.813 <sup>a</sup>     |                    | 4.796                |                         | 4.828              |                   |
| GaAs                           | 5.6536 <sup>6</sup>     | 5.658 <sup>a</sup>     |                    | 5.684                |                         | 5.747              |                   |
| GaN-zb                         | 4.509 <sup>3</sup>      | 4.506 <sup>a</sup>     |                    | 4.457                |                         |                    | 4.499             |
| GaP-zb                         | 5.439 <sup>3</sup>      | 5.447 <sup>a</sup>     |                    | 5.449                |                         |                    | 5.446             |
| Ge                             | 5.6579 <sup>6</sup>     | 5.660 <sup>a</sup>     |                    |                      | 5.719                   |                    |                   |
| InAs                           | 6.0583 <sup>6</sup>     | 6.063 <sup>a</sup>     |                    |                      |                         |                    |                   |
| InP                            | 5.8687 <sup>6</sup>     | 5.875 <sup>a</sup>     |                    |                      |                         |                    |                   |
| InSb                           | 6.4794 <sup>6</sup>     | 6.478 <sup>a</sup>     |                    |                      |                         |                    |                   |
| LiCl                           | 5.070 <sup>3</sup>      | 5.067 <sup>a</sup>     |                    | 5.147                | 5.092                   |                    | 5.096             |
| LiF                            | 3.972 <sup>3</sup>      | 3.968 <sup>a</sup>     |                    | 4.018                | 3.927                   | 4.060              | 3.986             |
| MgO                            | 4.217 <sup>9</sup>      | 4.2155                 | 4.207              | 4.210                | 4.158                   | 4.254              | 4.204             |
| NaCl                           | 5.6402 <sup>10,11</sup> | 5.6472                 | 5.670              | 5.662                | 5.594                   | 5.698              | 5.593             |
| SiC-3c                         | 4.346 <sup>3</sup>      | 4.347 <sup>a</sup>     |                    | 4.351                | 4.349                   | 4.380              | 4.360             |
| Si                             | 5.431 <sup>12</sup>     | 5.4360                 | 5.472              | 5.442                | 5.447                   | 5.470              | 5.434             |
| SiO <sub>2</sub>               | 4.9124 <sup>13</sup>    | 4.909 <sup>a</sup>     |                    |                      |                         |                    |                   |
| MAD                            |                         | 0.004                  | 0.020              | 0.033                | 0.031                   | 0.044              | 0.021             |

a: this work.

b: see also <sup>14</sup>

**Table S2.** Calculated and observed orbital bandgap, in eV.

| Material                                  | Obs.                  | PBE <sup>2,3</sup> | SCAN <sub>4, 15, 16</sub> | mBJLDA <sub>4</sub> | PBE0 <sub>16, 17</sub> | HSE06 <sub>1-3</sub> | B3LYP <sub>a</sub> | CAM-B3LYP         | WOT-SRSH <sup>18</sup> | PBE0( $\alpha$ ) <sub>19</sub> | sc-hybrid <sub>17</sub> | RSH m <sub>WS</sub> <sub>17</sub> | RSH m <sub>TF</sub> <sub>17</sub> | RSH m <sub>erfc-fit</sub> <sub>17</sub> | DD-PBEH <sup>2</sup> | RS-DDH <sup>2</sup> | DD0-RHS-CAM <sup>2</sup> | DD-RSH-CAM <sup>2</sup> |
|-------------------------------------------|-----------------------|--------------------|---------------------------|---------------------|------------------------|----------------------|--------------------|-------------------|------------------------|--------------------------------|-------------------------|-----------------------------------|-----------------------------------|-----------------------------------------|----------------------|---------------------|--------------------------|-------------------------|
| Al <sub>2</sub> O <sub>3</sub> - $\alpha$ | 9.57 <sup>20,21</sup> | 6.27               |                           | 8.34                | 8.80                   | 8.07                 |                    | 9.42              |                        |                                | 9.71                    | 9.63                              | 9.61                              |                                         | 9.40                 | 9.61                | 9.60                     | 9.51                    |
| AlAs                                      | 2.23 <sup>6</sup>     | 1.32               | 1.74                      | 2.13                |                        | 1.93                 |                    | 2.69              |                        |                                |                         |                                   |                                   |                                         | 1.91                 | 1.90                | 2.05                     | 2.11                    |
| AlN-wz                                    | 6.23 <sup>22</sup>    | 4.18               | 3.97                      | 5.51                | 6.31                   | 4.55                 |                    | 6.41              | 6.60                   | 7.30                           | 6.23                    | 6.22                              | 6.23                              |                                         | 6.10                 | 6.11                | 6.25                     | 6.26                    |
| AlP-zb                                    | 2.45 <sup>22</sup>    | 1.56               | 1.92                      | 2.31                | 2.98                   | 2.33                 |                    | 2.99              | 2.60                   |                                | 2.37                    | 2.43                              | 2.42                              | 2.40                                    | 2.30                 | 2.33                | 2.41                     | 2.52                    |
| h-BN                                      | 6.42 <sup>23</sup>    | 4.29               | 4.78                      |                     | 6.30                   | 5.58                 |                    | 6.62 <sup>1</sup> |                        |                                |                         |                                   |                                   |                                         |                      |                     |                          |                         |
| BN                                        | 6.36 <sup>24</sup>    | 4.53               | 4.98                      | 5.8                 | 6.51                   | 5.79                 | 5.93               |                   |                        |                                | 6.33                    | 6.33                              | 6.34                              | 6.33                                    | 6.37                 | 6.39                | 6.55                     |                         |
| BP                                        | 2.10 <sup>25 b</sup>  | 1.25               | 1.54                      | 1.85                |                        | 1.99                 |                    | 2.58              |                        |                                |                         |                                   |                                   |                                         | 1.92                 | 1.93                | 2.02                     | 2.02                    |
| C                                         | 5.50 <sup>32</sup>    | 4.21               | 4.54                      | 4.92                | 5.95                   | 5.30 <sup>1</sup>    | 5.99               | 5.66 <sup>1</sup> | 5.7                    | 5.7                            | 5.42                    | 5.44                              | 5.45                              | 5.43                                    | 5.56                 | 5.57                | 5.63                     | 5.61                    |
| CaO                                       | 7.09 <sup>26</sup>    | 3.66               |                           | 5.35                |                        | 5.30                 |                    | 7.48              |                        | 6.29                           |                         |                                   |                                   |                                         | 6.42                 | 6.39                | 6.99                     | 7.17                    |
| GaAs                                      | 1.52 <sup>22</sup>    | 0.42               | 0.77                      | 1.64                |                        | 1.26                 |                    | 1.72              |                        |                                |                         |                                   |                                   |                                         | 0.79                 | 0.90                | 1.38                     | 1.45                    |
| GaN-zb                                    | 3.51 <sup>22</sup>    | 1.94               | 1.96                      | 2.85                | 3.68                   | 2.92                 |                    | 3.50              | 3.80                   |                                | 3.26                    | 3.30                              | 3.30                              |                                         | 3.32                 | 3.34                | 3.43                     | 3.50                    |
| GaP-zb                                    | 2.35 <sup>22</sup>    | 1.65               | 1.83                      | 2.25                | 2.93                   | 2.30                 |                    | 3.09              | 2.40                   |                                |                         |                                   |                                   |                                         | 2.15                 | 2.19                | 2.36                     | 2.42                    |
| Ge                                        | 0.74 <sup>22</sup>    | metal              | 0.14                      | 0.83                |                        | 0.61                 |                    | 1.05              |                        |                                |                         |                                   |                                   |                                         | 0.18                 | 0.22                | 0.34                     | 0.50                    |
| InAs                                      | 0.42 <sup>6</sup>     |                    | metal                     | 0.67                |                        |                      |                    | 0.65              |                        |                                |                         |                                   |                                   |                                         |                      |                     |                          |                         |
| InP                                       | 1.42 <sup>6 b</sup>   | 0.69               | 1.02                      | 2.31                |                        | 1.47                 |                    | 1.58              |                        |                                |                         |                                   |                                   |                                         | 1.21                 | 1.25                | 1.49                     | 1.55                    |
| InSb                                      | 0.24 <sup>6 b</sup>   |                    | metal                     | 0.37                |                        |                      |                    | 0.65              |                        |                                |                         |                                   |                                   |                                         |                      |                     |                          |                         |
| LiCl                                      | 9.40 <sup>27</sup>    | 6.41               | 7.33                      | 8.64                | 8.66                   | 7.78                 |                    | 9.65              |                        |                                | 9.62                    | 9.52                              | 9.54                              |                                         | 9.49                 | 9.41                | 9.87                     | 9.89                    |
| LiF                                       | 14.2 <sup>28</sup>    | 9.27               | 10.10                     | 12.89               | 12.18                  | 11.47                |                    | 13.96             | 15.40                  |                                | 15.69                   | 15.24                             | 15.18                             | 15.42                                   | 14.90                | 14.59               | 15.97                    | 15.56                   |
| MgO                                       | 7.67 <sup>29,30</sup> | 4.8                | 5.79                      | 7.13                | 7.25                   | 6.46 <sup>1</sup>    | 6.97               | 7.54 <sup>1</sup> | 8.2                    | 7.71                           | 8.33                    | 8.23                              | 8.22                              | 8.27                                    | 7.93                 | 7.88                | 8.28                     | 8.19                    |
| NaCl                                      | 8.6 <sup>31</sup>     | 5.2                | 5.99                      | 8.45                | 7.26                   | 6.43 <sup>1</sup>    | 6.78               | 8.83 <sup>1</sup> |                        | 8.71                           | 8.84                    | 8.6                               | 8.66                              | 8.71                                    | 8.75                 | 8.64                | 9.1                      | 9.1                     |
| Si                                        | 1.17 <sup>32</sup>    | 0.7                | 0.82                      | 1.15                | 1.75                   | 1.16 <sup>1</sup>    | 1.78               | 2.26 <sup>1</sup> | 1.1                    | 1.56                           | 0.99                    | 1.03                              | 1.02                              | 1.01                                    | 0.96                 | 0.99                | 1.1                      | 1.14                    |
| SiC-3c                                    | 2.42 <sup>33</sup>    | 1.36               | 1.72                      | 2.25                | 2.91                   | 2.26                 |                    | 3.18              |                        | 2.40                           | 2.29                    | 2.32                              | 2.32                              | 2.31                                    | 2.33                 | 2.35                | 2.41                     | 2.47                    |
| SiO <sub>2</sub>                          | 9.65 <sup>34</sup>    | 5.95               |                           | 8.70                |                        | 7.69                 |                    | 9.77              |                        | 10.20                          |                         |                                   |                                   |                                         | 9.99                 | 9.88                | 10.58                    | 10.40                   |
| MAD                                       |                       | 2.01               | 1.30                      | 0.52                | 0.60                   | 0.86                 | 0.81               | 0.33              | 0.35                   | 0.40                           | 0.30                    | 0.20                              | 0.20                              | 0.30                                    | 0.28                 | 0.23                | 0.30                     | 0.25                    |
| MAX                                       |                       | 4.93               | 4.10                      | 1.75                | 2.02                   | 2.73                 | 1.82               | 1.09              | 1.20                   | 1.07                           | 1.49                    | 1.04                              | 0.98                              | 1.22                                    | 0.73                 | 0.71                | 1.77                     | 1.36                    |

a: this work, see also. <sup>35</sup> b: uncorrected optical bandgap.

**Table S1 and S2 References**

- 1 M. Li, J. R. Reimers, M. J. Ford, R. Kobayashi and R. D. Amos, *J. Comput. Chem.*, 2021, **42**, 1486.
- 2 W. Chen, G. Miceli, G.-M. Rignanese and A. Pasquarello, *Phys. Rev. Mater.*, 2018, **2**, 073803.
- 3 L. Schimka, J. Harl and G. Kresse, *J. Chem. Phys.*, 2011, **134**, 024116.
- 4 F. Tran, P. Kovács, L. Kalantari, G. K. H. Madsen and P. Blaha, *J. Chem. Phys.*, 2018, **149**, 144105.
- 5 R. E. Newnham and Y. M. de Haan, *Z. Krist.*, 1962, **117**, 235.
- 6 O. Madelung, *Semiconductors: Data Handbook*, Springer-Verlag, Berlin, 2004.
- 7 W. Paszkowicz, J. B. Pelka, M. Knapp, T. Szyszko and S. Podsiadlo, *Applied Physics A*, 2002, **75**, 431.
- 8 S. Shikata, T. Tanno, T. Teraji, H. Kanda, T. Yamada and J.-i. Kushibiki, *Japanese Journal of Applied Physics*, 2018, **57**, 111301.
- 9 B. Zaidi, S. Belghit, M. S. Ullah, B. Hadjoudja, A. Guerraoui, S. Gagui, N. Houaidji, B. Chouial and C. Shekhar, *Metallofiz. Noveishie Tekhnol.*, 2019, **41**, 1121—1126
- 10 W. T. Barrett and W. E. Wallace, *J. Am. Chem. Soc.*, 1954, **76**, 366.
- 11 V. S. Urusov and V. V. Blinov, *Bulletin of the Academy of Sciences of the USSR, Division of chemical science*, 1970, **19**, 231.
- 12 J. R. Rumble, T. J. Bruno, M. J. Doa and C. R. C. Press, *CRC handbook of chemistry and physics a ready-reference book of chemical and physical data*, CRC Press, Boca Raton, 2020.
- 13 R. Ratnawulan, A. Fauzi and A. E. S. Hayati, *IOP Conference Series: Materials Science and Engineering*, 2018, **335**, 012008.
- 14 J. Paier, M. Marsman and G. Kresse, *J. Chem. Phys.*, 2007, **127**, 024103.
- 15 D. Mejia-Rodriguez and S. B. Trickey, *Phys. Rev. B*, 2018, **98**, 115161.
- 16 P. Borlido, T. Aull, A. W. Huran, F. Tran, M. A. L. Marques and S. Botti, *J. Chem. Theory Comput.*, 2019, **15**, 5069.
- 17 J. H. Skone, M. Govoni and G. Galli, *Phys. Rev. B*, 2016, **93**, 235106.
- 18 D. Wing, G. Ohad, J. B. Haber, M. R. Filip, S. E. Gant, J. B. Neaton and L. Kronik, *Proceedings of the National Academy of Sciences*, 2021, **118**, e2104556118.
- 19 G. Miceli, W. Chen, I. Reshetnyak and A. Pasquarello, *Phys. Rev. B*, 2018, **97**, 121112.
- 20 R. H. French, D. J. Jones and S. Loughin, *J. Am. Ceram. Soc.*, 1994, **77**, 412.
- 21 F. G. Will, H. G. DeLorenzi and K. H. Janora, *J. Am. Ceram. Soc.*, 1992, **75**, 295.
- 22 I. Vurgaftman, J. R. Meyer and L. R. Ram-Mohan, *J. Appl. Phys.*, 2001, **89**, 5815.
- 23 T. C. Doan, J. Li, J. Y. Lin and H. X. Jiang, *Appl. Phys. Lett.*, 2016, **109**, 122101.
- 24 D. A. Evans, A. G. McGlynn, B. M. Towlson, M. Gunn, D. Jones, T. E. Jenkins, R. Winter and N. R. J. Poolton, *Journal of Physics Condensed Matter*, 2008, **20**.
- 25 A. Agui, S. Shin and Y. Kumashiro, *J. Phys. Soc. Jpn.*, 1999, **68**, 166.
- 26 R. C. Whited, C. J. Flaten and W. C. Walker, *Solid State Commun.*, 1973, **13**, 1903.
- 27 S.-i. Nakai and T. Sagawa, *J. Phys. Soc. Jpn.*, 1969, **26**, 1427.
- 28 M. Piacentini, D. W. Lynch and C. G. Olson, *Phys. Rev. B*, 1976, **13**, 5530.
- 29 L. X. Benedict, E. L. Shirley and R. B. Bohn, *Phys. Rev. Lett.*, 1998, **80**, 4514.
- 30 U. Schönberger and F. Aryasetiawan, *Phys. Rev. B*, 1995, **52**, 8788.
- 31 F. Bechstedt, K. Seino, P. H. Hahn and W. G. Schmidt, *Phys. Rev. B*, 2005, **72**, 245114.
- 32 M. S. Hybertsen and S. G. Louie, *Phys. Rev. B*, 1986, **34**, 5390.
- 33 R. G. Humphreys, D. Bimberg and W. J. Choyke, *Solid State Commun.*, 1981, **39**, 163.
- 34 H. R. Philipp, *Solid State Commun.*, 1966, **4**, 73.
- 35 J. Muscat, A. Wander and N. M. Harrison, *Chem. Phys. Lett.*, 2001, **342**, 397.

**Table S3.** Bandgaps for the new materials CAM-B3LYP calculations listed in Table S2 as a function of the sampling of the Brillion zone.

| Material                       | <i>k</i> -points | number | bandgap / eV | Material | <i>k</i> -points | number | bandgap / eV |
|--------------------------------|------------------|--------|--------------|----------|------------------|--------|--------------|
| Al <sub>2</sub> O <sub>3</sub> | 2x2x1            | 4      | 9.630        | AlAs     | 2×2×2            | 8      | 2.923        |
|                                | 4x4x2            | 32     | 9.474        |          | 4×4×4            | 64     | 2.905        |
|                                | 8x8x4            | 256    | 9.422        |          | 6×6×6            | 216    | 2.878        |
|                                | 9x9x5            | 405    | 9.421        |          | 8×8×8            | 512    | 2.766        |
|                                | 12x12x5          | 720    | 9.416        |          | 10×10×10         | 1000   | 2.732        |
|                                | 12x12x6          | 864    | 9.416        |          | 12×12×12         | 1728   | 2.714        |
|                                |                  |        |              |          | 15×15×15         | 3375   | 2.709        |
| AlN-wz                         | 2×2×1            | 4      | 6.570        | AlP-zb   | 2×2×2            | 8      | 3.132        |
|                                | 4×4×2            | 32     | 6.465        |          | 4×4×4            | 64     | 3.096        |
|                                | 6×6×3            | 108    | 6.430        |          | 6×6×6            | 216    | 3.073        |
|                                | 8×8×4            | 256    | 6.417        |          | 8×8×8            | 512    | 3.066        |
|                                | 10×10×4          | 400    | 6.415        |          | 12×12×12         | 1728   | 3.065        |
|                                | 12×12×5          | 720    | 6.412        |          |                  |        |              |
|                                | 15×15×6          | 1350   | 6.410        |          |                  |        |              |
|                                | 16×16×6          | 1536   | 6.410        |          |                  |        |              |
| BP                             | 2×2×2            | 8      | 2.793        | CaO      | 2×2×2            | 8      | 7.713        |
|                                | 4×4×4            | 64     | 2.775        |          | 4×4×4            | 64     | 7.572        |
|                                | 6×6×6            | 216    | 2.748        |          | 6×6×6            | 216    | 7.509        |
|                                | 8×8×8            | 512    | 2.636        |          | 8×8×8            | 512    | 7.493        |
|                                | 10×10×10         | 1000   | 2.597        |          | 10×10×10         | 1000   | 7.487        |
|                                | 12×12×12         | 1728   | 2.588        |          | 12×12×12         | 1728   | 7.484        |
|                                | 15×15×15         | 3375   | 2.586        |          | 15×15×15         | 3375   | 7.483        |
| GaAs                           | 2×2×2            | 8      | 2.331        | GaN-zb   | 2×2×2            | 8      | 3.717        |
|                                | 4×4×4            | 64     | 1.996        |          | 4×4×4            | 64     | 3.603        |
|                                | 6×6×6            | 216    | 1.870        |          | 6×6×6            | 216    | 3.537        |
|                                | 8×8×8            | 512    | 1.799        |          | 8×8×8            | 512    | 3.512        |
|                                | 10×10×10         | 1000   | 1.791        |          | 10×10×10         | 1000   | 3.501        |
|                                | 12×12×12         | 1728   | 1.787        |          | 12x12x12         | 1728   | 3.498        |
|                                | 15×15×15         | 3375   | 1.786        |          | 15x15x15         | 3375   | 3.496        |
| GaP-zb                         | 2×2×2            | 8      | 3.287        | Ge       | 2×2×2            | 8      | 1.477        |

|      |          |      |        |      |          |      |       |
|------|----------|------|--------|------|----------|------|-------|
|      | 4×4×4    | 64   | 3.210  |      | 4×4×4    | 64   | 1.189 |
|      | 6×6×6    | 216  | 3.252  |      | 6×6×6    | 216  | 1.007 |
|      | 8×8×8    | 512  | 3.130  |      | 8×8×8    | 512  | 0.999 |
|      | 10×10×10 | 1000 | 3.093  |      | 10×10×10 | 1000 | 1.503 |
|      | 12×12×12 | 1728 | 3.090  |      | 12×12×12 | 1728 | 0.989 |
| InAs | 2×2×2    | 8    | 1.092  | InP  | 2×2×2    | 8    | 1.745 |
|      | 4×4×4    | 64   | 0.837  |      | 4×4×4    | 64   | 1.683 |
|      | 6×6×6    | 216  | 0.690  |      | 6×6×6    | 216  | 1.618 |
|      | 8×8×8    | 512  | 0.662  |      | 8×8×8    | 512  | 1.593 |
|      | 10×10×10 | 1000 | 0.660  |      | 10×10×10 | 1000 | 1.586 |
|      | 12×12×12 | 1728 | 0.659  |      | 12×12×12 | 1728 | 1.584 |
|      | 15×15×15 | 3375 | 0.658  |      | 15×15×15 | 3375 | 1.579 |
| InSb | 2×2×2    | 8    | 1.042  | LiCl | 4×4×4    | 64   | 9.743 |
|      | 4×4×4    | 64   | 0.814  |      | 5×5×5    | 125  | 9.703 |
|      | 6×6×6    | 216  | 0.661  |      | 6×6×6    | 216  | 9.684 |
|      | 8×8×8    | 512  | 0.580  |      | 7×7×7    | 343  | 9.674 |
|      | 10×10×10 | 1000 | 0.559  |      | 8×8×8    | 512  | 9.669 |
|      | 12×12×12 | 1728 | 0.553  |      | 9×9×9    | 729  | 9.665 |
|      | 15×15×15 | 3375 | 0.551  |      | 10×10×10 | 1000 | 9.660 |
|      |          |      |        |      | 11×11×11 | 1331 | 9.657 |
|      |          |      |        |      | 12×12×12 | 1728 | 9.656 |
|      |          |      |        |      | 13×13×13 | 2197 | 9.655 |
|      |          |      |        |      | 14×14×14 | 2744 | 9.654 |
| LiF  | 4×4×4    | 64   | 14.030 | SiC  | 4×4×4    | 64   | 3.225 |
|      | 5×5×5    | 125  | 13.995 |      | 5×5×5    | 125  | 3.692 |
|      | 6×6×6    | 216  | 13.979 |      | 6×6×6    | 216  | 3.196 |
|      | 7×7×7    | 343  | 13.971 |      | 7×7×7    | 343  | 3.437 |
|      | 8×8×8    | 512  | 13.967 |      | 8×8×8    | 512  | 3.184 |
|      | 9×9×9    | 729  | 13.964 |      | 9×9×9    | 729  | 3.332 |
|      | 10×10×10 | 1000 | 13.962 |      | 10x10x10 | 1000 | 3.179 |
|      | 11×11×11 | 1331 | 13.961 |      | 12x12x12 | 1728 | 3.177 |
|      | 12×12×12 | 1728 | 13.960 |      | 14x14x14 | 2744 | 3.176 |
|      | 13×13×13 | 2197 | 13.958 |      | 16x16x16 | 4096 | 3.175 |

|                  |          |      |        |
|------------------|----------|------|--------|
|                  | 14×14×14 | 2744 | 13.958 |
|                  | 15×15×15 | 3375 | 13.957 |
| SiO <sub>2</sub> | 2x2x1    | 4    | 9.903  |
|                  | 4x4x2    | 32   | 9.770  |
|                  | 8x8x4    | 256  | 9.744  |
|                  | 9x9x5    | 405  | 9.739  |
|                  | 12x12x5  | 720  | 9.738  |
|                  | 12x12x6  | 864  | 9.738  |

**Table S4.** Details of calculations of the CAM-B3LYP optical transition energies for Al<sub>2</sub>O<sub>3</sub> and LiF.<sup>a</sup>

| Material                       | <i>k</i> -points | ENCUT<br>/ eV | orbital<br>bandgap / eV | exciton binding<br>energy / eV | optical transition<br>energy / eV |
|--------------------------------|------------------|---------------|-------------------------|--------------------------------|-----------------------------------|
| LiF                            | 8×8×8            | 400           | 13.96                   | 1.36                           | 12.60                             |
|                                | 8×8×8            | 850           | 13.97                   | 1.30                           | 12.67                             |
| Al <sub>2</sub> O <sub>3</sub> | 2×2×1            | 400           | 9.42                    | 0.34                           | 9.08                              |
|                                | 4×4×2            | 850           | 9.47                    | 0.30                           | 9.17                              |
|                                | 9×9×5            | 850           | 9.42                    | 0.25                           | 9.17                              |
|                                | 12×12×6          | 850           | 9.42                    | 0.21                           | 9.21                              |

a: calculations in the table are for the lowest triplet state. The singlet-triplet difference is estimated as twice the energy difference between excited-state calculations with parallel spins (triplet) and with antiparallel spins (half singlet, half triplet). For Al<sub>2</sub>O<sub>3</sub>, the singlet-triplet difference is 0.011 eV using 4×4×2 *k*-points and 0.010 eV using 9×9×5. For LiF, the singlet-triplet difference is 0.008 eV at 8×8×8 *k*-points. Hence the best-estimate singlet excitation energies are 12.68 eV for LiF and 9.22 eV for Al<sub>2</sub>O<sub>3</sub>.

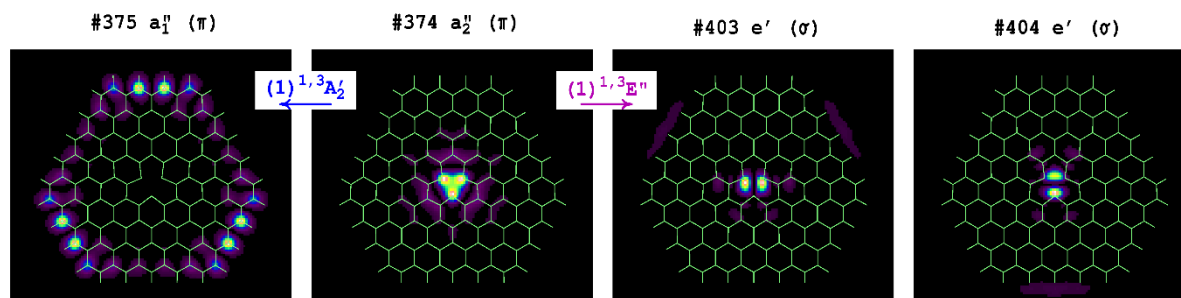

**Fig. S1.** Key HSE06 orbitals of **4**, analogous to the CAM-B3LYP orbitals shown in Fig. 2.

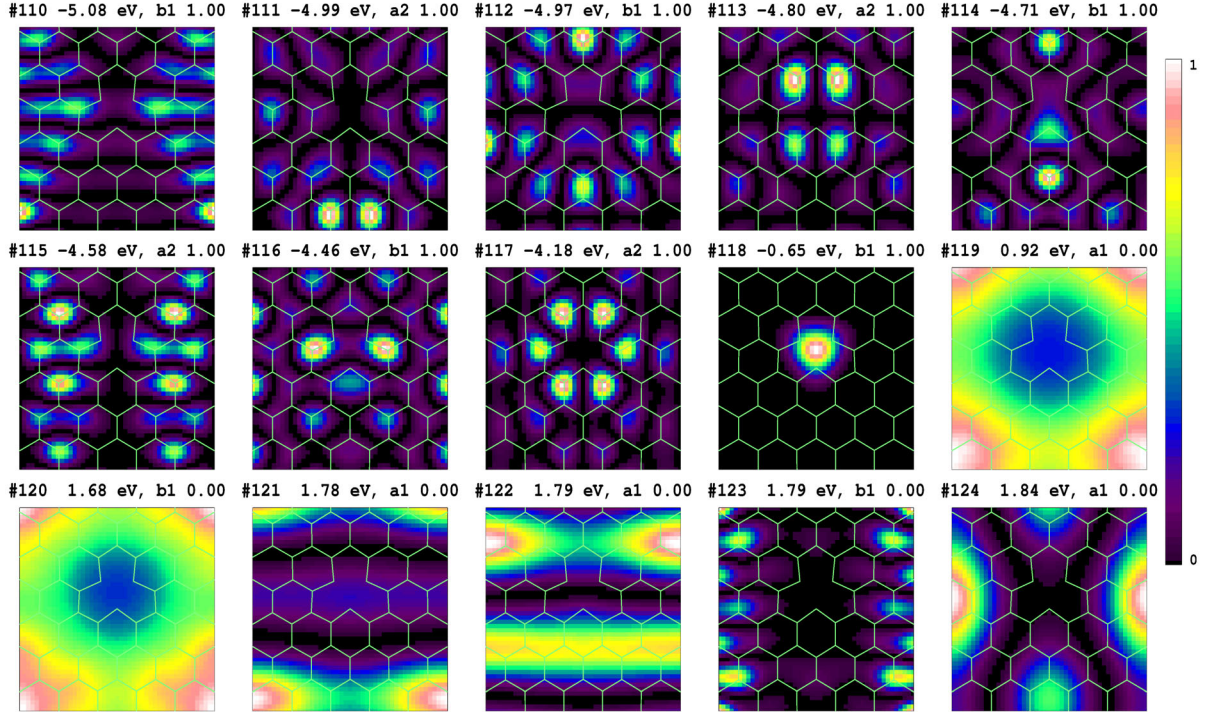

**Fig. S2.** Frontier orbitals from HSE06,  $(1)^1A_1$  state,  $P_{53}$   $1 \times 1 \times 1$  model, showing the relative electron density at a distance of 0.80 Å above the h-BN plane.

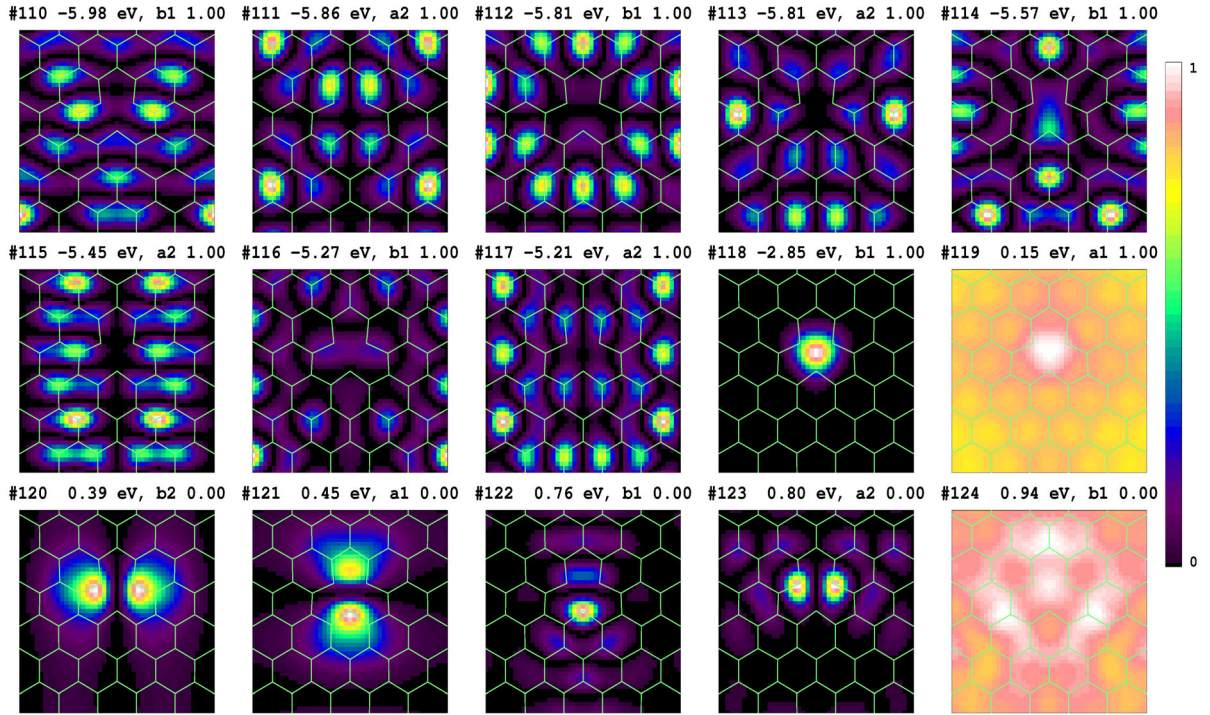

**Fig. S3.** Frontier orbitals from HSE06,  $(1)^3B_1$  state,  $P_{53}$   $1 \times 1 \times 1$  model, showing the relative electron density at a distance of 0.80 Å above the h-BN plane.



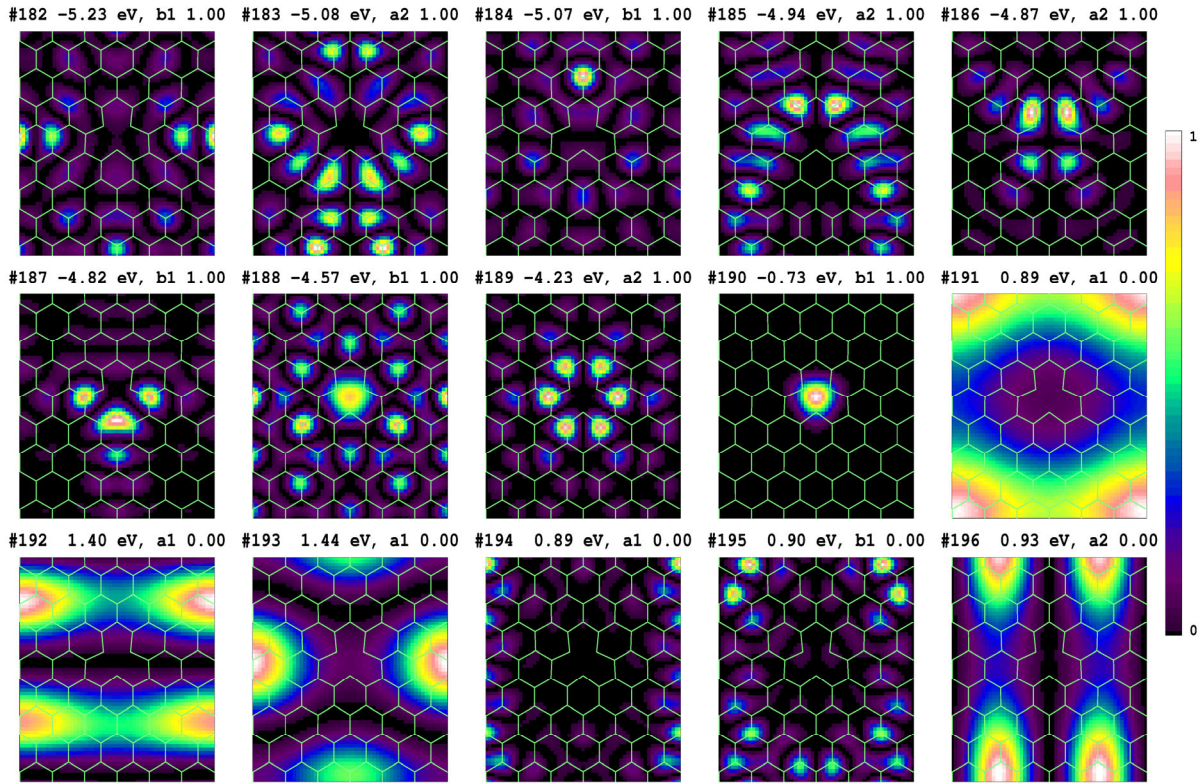

**Fig. S4.** Frontier orbitals from HSE06,  $(1)^1A_1$  state,  $P_{64}$   $1\times 1\times 1$  model, showing the relative electron density at a distance of 0.80 Å above the h-BN plane.

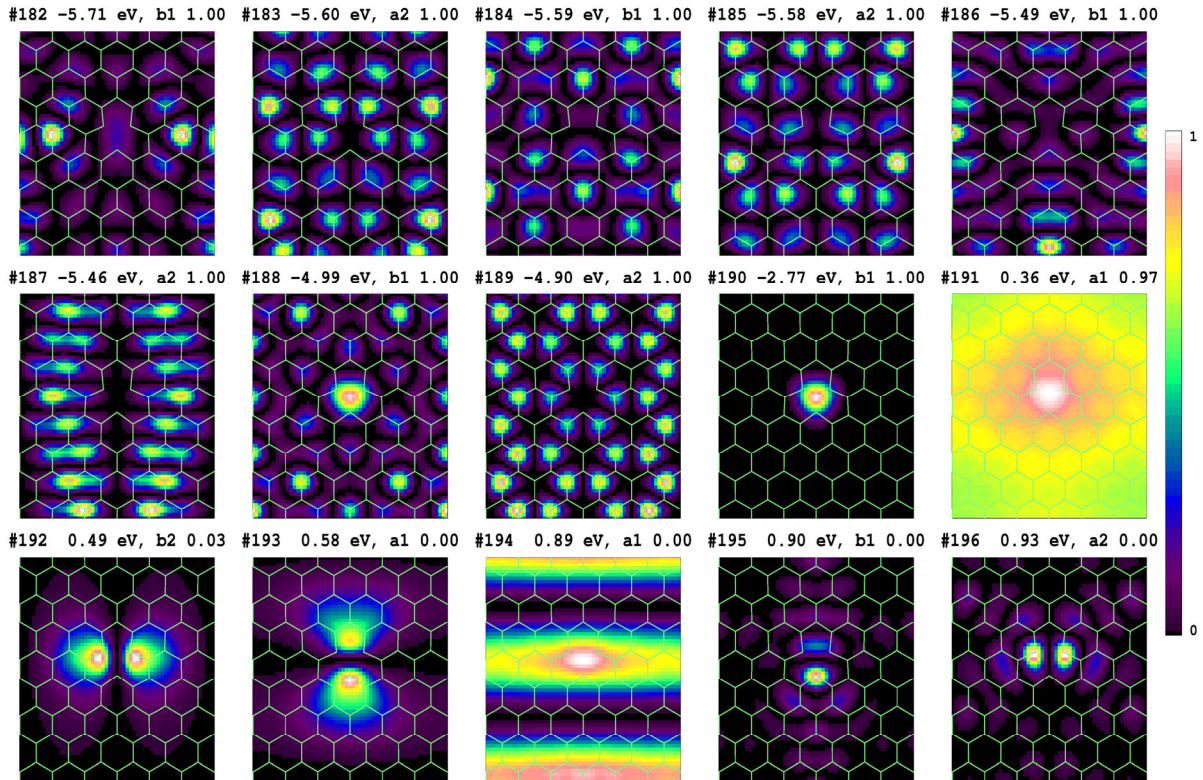

**Fig. S5.** Frontier orbitals from HSE06,  $(1)^3B_1$  state,  $P_{64}$   $1\times 1\times 1$  model, showing the relative electron density at a distance of 0.80 Å above the h-BN plane.



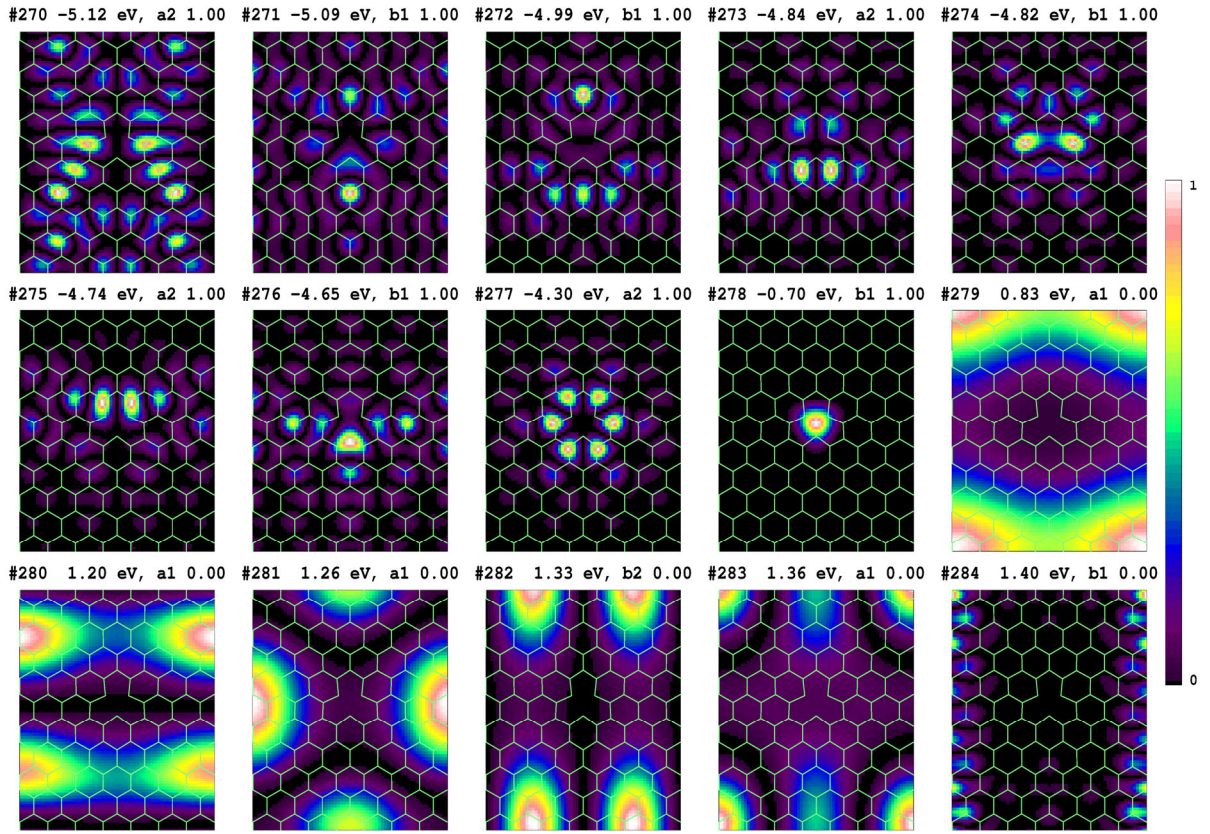

**Fig. S6.** Frontier orbitals from HSE06,  $(1)^1A_1$  state,  $P_{75}$   $1\times 1\times 1$  model, showing the relative electron density at a distance of 0.80 Å above the h-BN plane.

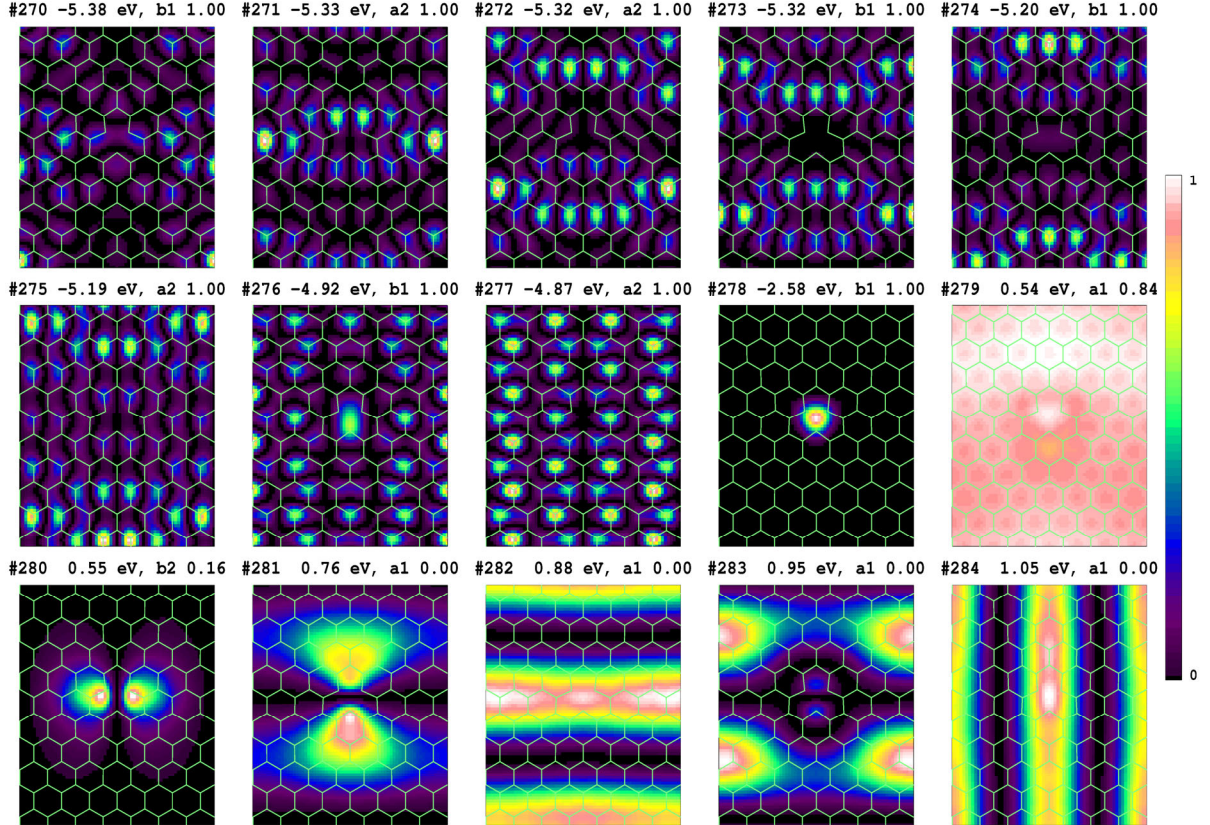

**Fig. S7.** Frontier orbitals from HSE06,  $(1)^3B_1$  state,  $P_{75}$   $1\times 1\times 1$  model, showing the relative electron density at a distance of 0.80 Å above the h-BN plane.



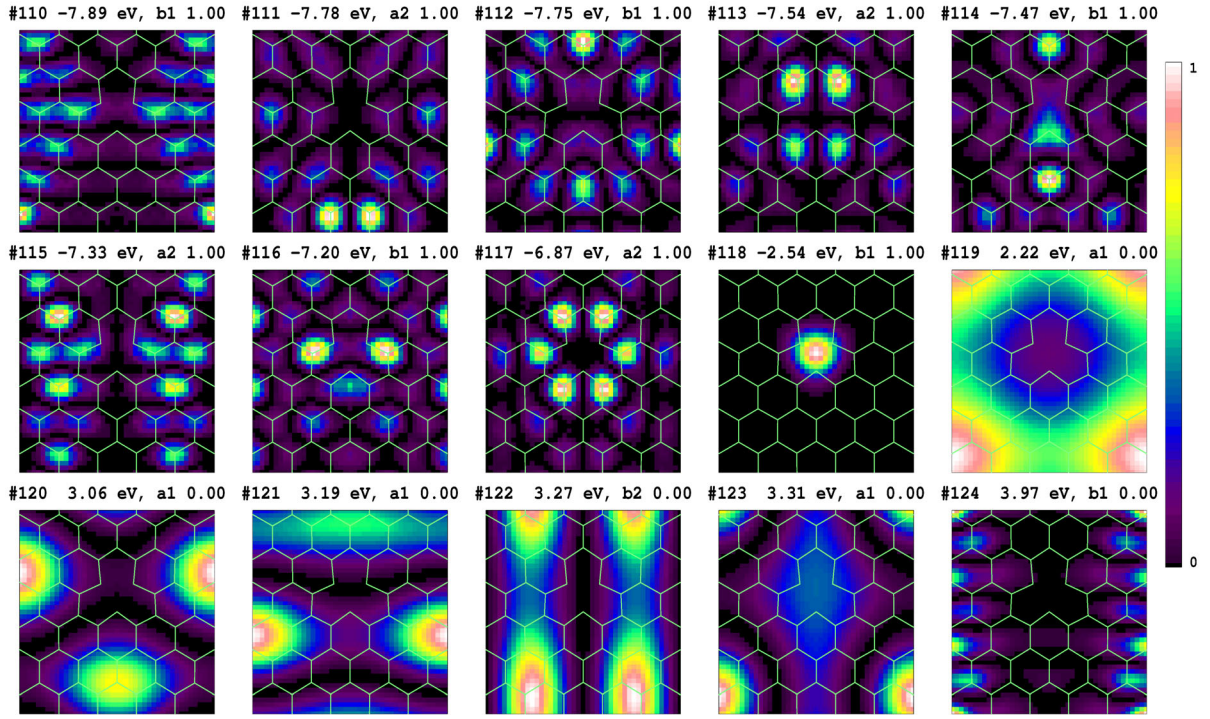

**Fig. S8.** Frontier orbitals from CAM-B3LYP,  $(1)^1A_1$  state,  $P_{53}$   $1\times 1\times 1$  model, showing the relative electron density at a distance of 0.80 Å above the h-BN plane.

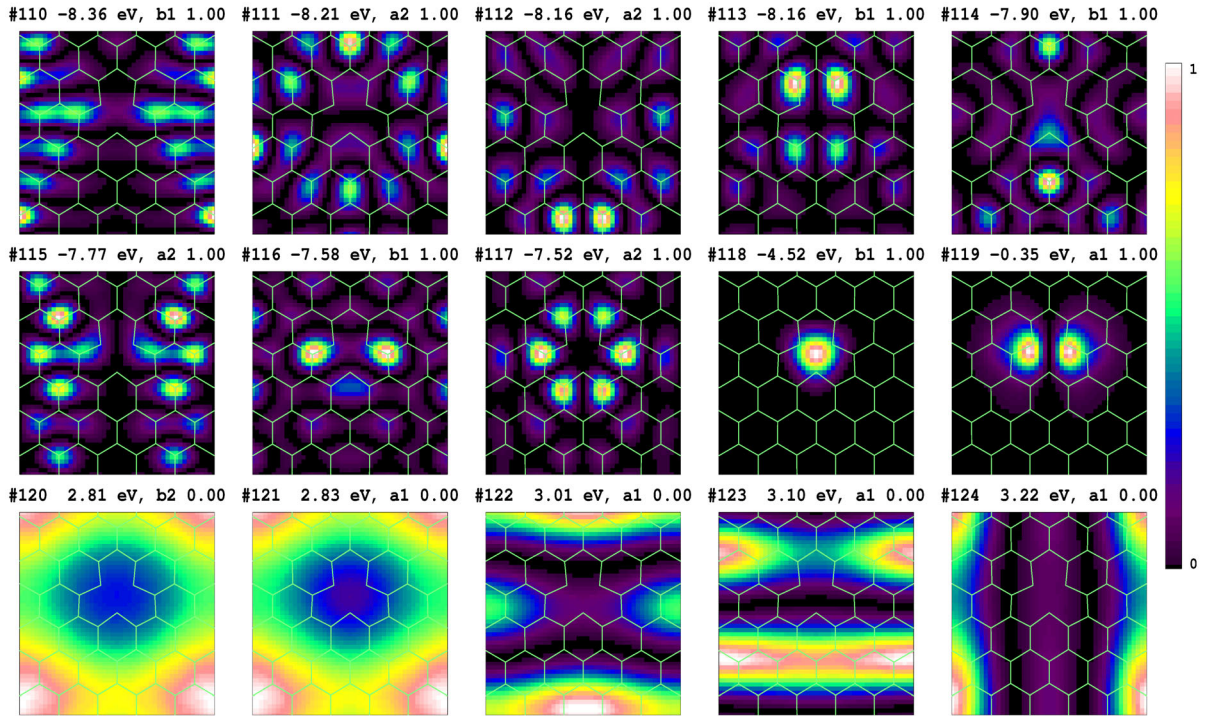

**Fig. S9.** Frontier orbitals from CAM-B3LYP,  $(1)^3B_1$  state,  $P_{53}$   $1\times 1\times 1$  model, showing the relative electron density at a distance of 0.80 Å above the h-BN plane.

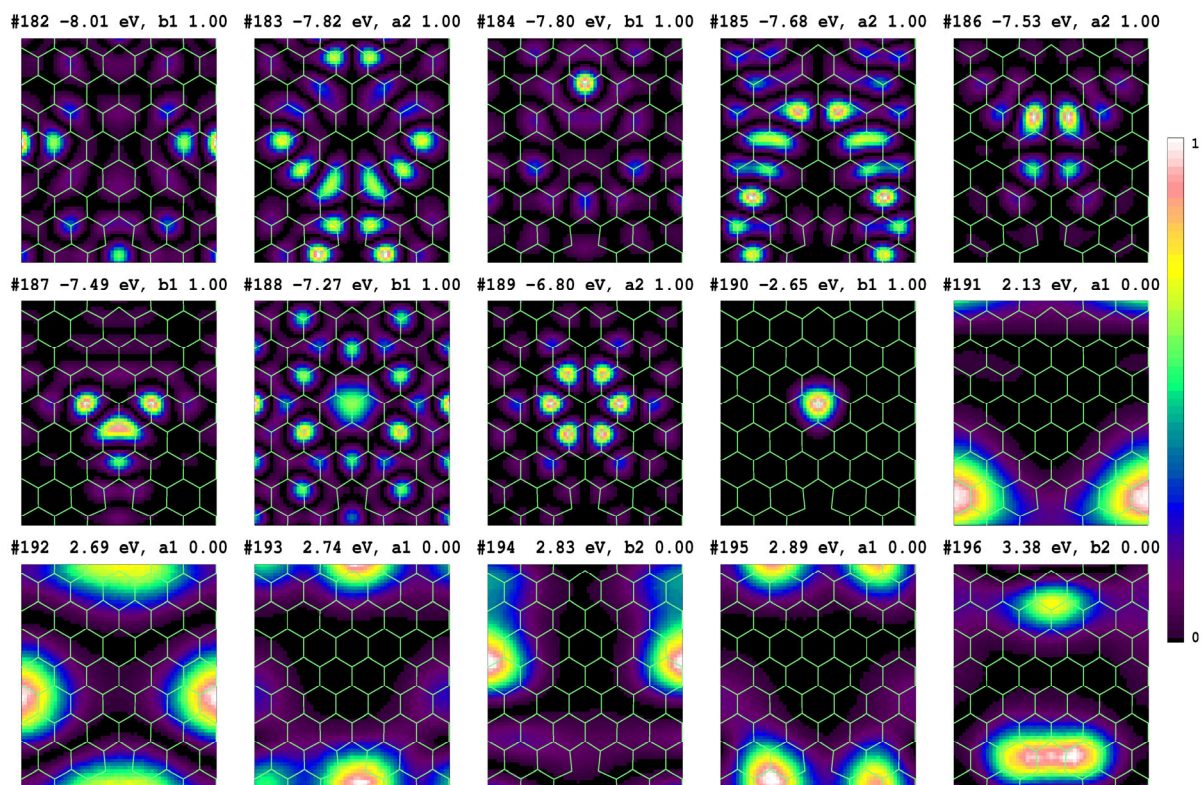

**Fig. S10.** Frontier orbitals from CAM-B3LYP,  $(1)^1A_1$  state,  $\mathbf{P}_{64}$   $1\times 1\times 1$  model, showing the relative electron density at a distance of  $0.80 \text{ \AA}$  above the h-BN plane.



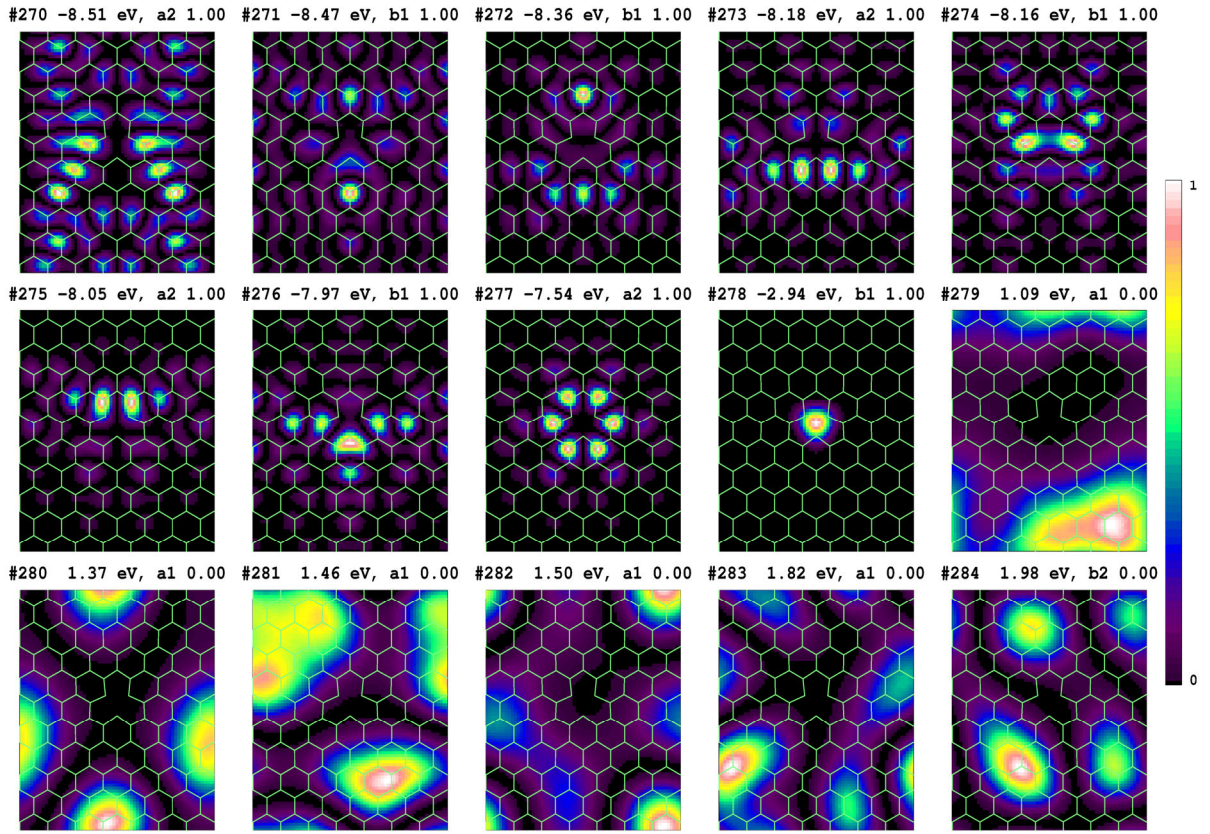

**Fig. S11.** Frontier orbitals from CAM-B3LYP,  $(1)^1A_1$  state,  $P_{75}$   $1\times 1\times 1$  model, showing the relative electron density at a distance of 0.80 Å above the h-BN plane.

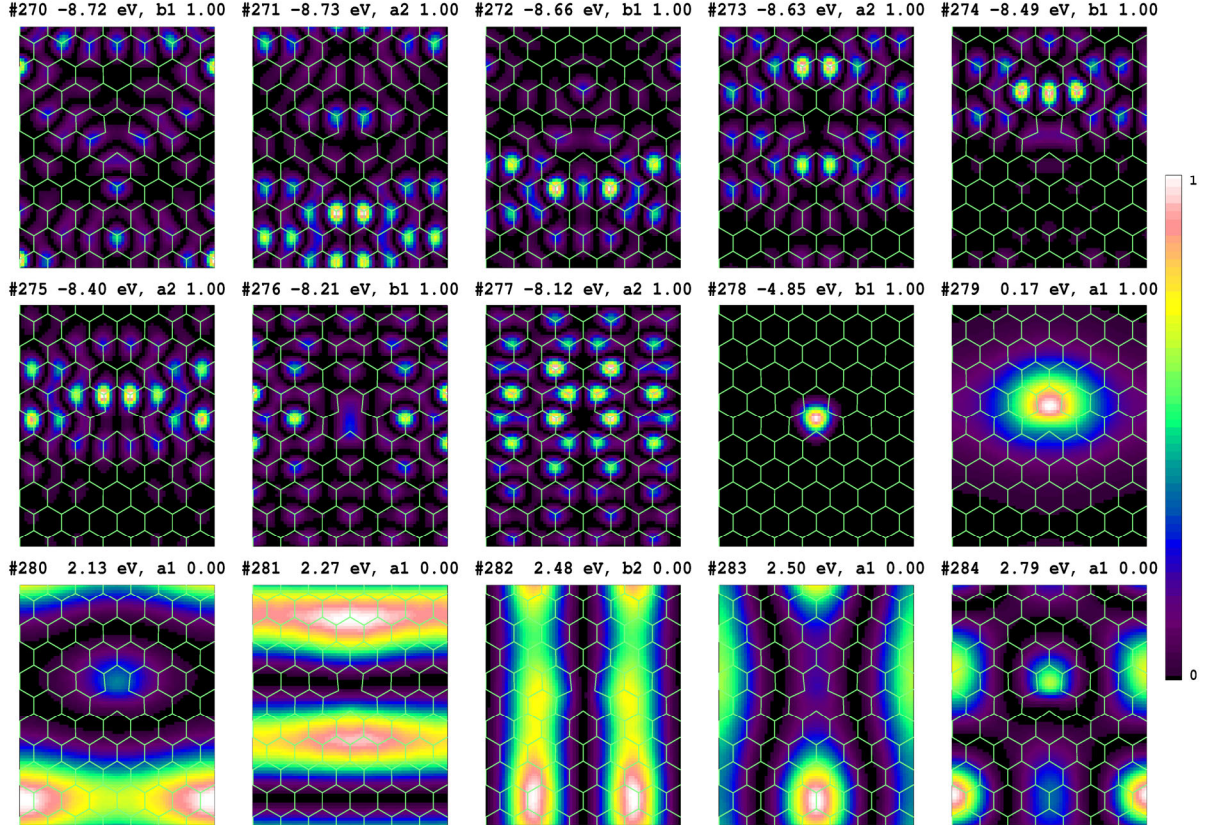

**Fig. S12.** Frontier orbitals from CAM-B3LYP,  $(1)^3B_1$  state,  $P_{75}$   $1\times 1\times 1$  model, showing the relative electron density at a distance of 0.80 Å above the h-BN plane.

**Cartesian coordinates** and calculation details for **1, 2, 3, 4, P<sub>53</sub>, P<sub>64</sub>, and P<sub>75</sub>** used in the vertical excitation-energy calculations, as well as for the 3D materials optimised by CAM-B3LYP (Tables 3, S1, and S2).

**1** CAM-B3LYP/6-31G\* (1)1A1'

|   |           |           |          |
|---|-----------|-----------|----------|
| 7 | 2.316286  | 0.044168  | 0.000000 |
| 7 | -2.316286 | 0.044168  | 0.000000 |
| 7 | -1.119892 | -2.028046 | 0.000000 |
| 7 | 1.196393  | 1.983878  | 0.000000 |
| 7 | -1.196393 | 1.983878  | 0.000000 |
| 7 | 1.119892  | -2.028046 | 0.000000 |
| 5 | 0.000000  | 1.097785  | 0.000000 |
| 5 | 0.000000  | -2.867163 | 0.000000 |
| 5 | -2.483036 | 1.433581  | 0.000000 |
| 5 | 2.483036  | 1.433581  | 0.000000 |
| 5 | -0.950709 | -0.548892 | 0.000000 |
| 5 | 0.950709  | -0.548892 | 0.000000 |
| 1 | 0.000000  | -4.072166 | 0.000000 |
| 1 | 1.017486  | 2.976542  | 0.000000 |
| 1 | -1.017486 | 2.976542  | 0.000000 |
| 1 | -3.086503 | -0.607102 | 0.000000 |
| 1 | 3.086503  | -0.607102 | 0.000000 |
| 1 | -2.069018 | -2.369439 | 0.000000 |
| 1 | 2.069018  | -2.369439 | 0.000000 |
| 1 | -3.526599 | 2.036083  | 0.000000 |
| 1 | 3.526599  | 2.036083  | 0.000000 |

#P cam-b3lyp/6-31g\* opt guess=read

Full point group D3H NOp 12

SCF Done: E(RCAM-B3LYP) = -483.103626497 A.U. after 8 cycles

---

**2** CAM-B3LYP/6-31G\* (1)1A1'

|   |           |           |          |
|---|-----------|-----------|----------|
| 7 | 6.240389  | 2.170220  | 0.000000 |
| 7 | 4.999660  | 4.319225  | 0.000000 |
| 7 | 3.738983  | 6.414858  | 0.000000 |
| 7 | 3.740000  | 2.159290  | 0.000000 |
| 7 | 2.478065  | 4.266132  | 0.000000 |
| 7 | 1.242707  | 6.405242  | 0.000000 |
| 7 | 1.215847  | 2.063588  | 0.000000 |
| 7 | 0.000000  | -4.318580 | 0.000000 |
| 7 | -7.424921 | 0.030626  | 0.000000 |
| 7 | -6.168456 | -2.126405 | 0.000000 |
| 7 | -4.925749 | -4.278837 | 0.000000 |
| 7 | -4.933611 | 0.013002  | 0.000000 |
| 7 | -3.685938 | -6.445483 | 0.000000 |
| 7 | -3.689553 | -2.130165 | 0.000000 |
| 7 | -2.455546 | -4.279134 | 0.000000 |
| 7 | -2.395043 | 0.021160  | 0.000000 |
| 7 | -1.240729 | -6.489445 | 0.000000 |
| 7 | -1.179196 | -2.084748 | 0.000000 |
| 7 | 7.424921  | 0.030626  | 0.000000 |
| 7 | 6.168456  | -2.126405 | 0.000000 |
| 7 | 4.925749  | -4.278837 | 0.000000 |
| 7 | 4.933611  | 0.013002  | 0.000000 |
| 7 | 3.685938  | -6.445483 | 0.000000 |
| 7 | 3.689553  | -2.130165 | 0.000000 |
| 7 | 2.455546  | -4.279134 | 0.000000 |
| 7 | 2.395043  | 0.021160  | 0.000000 |
| 7 | 1.240729  | -6.489445 | 0.000000 |



|   |           |           |          |
|---|-----------|-----------|----------|
| 7 | 1.179196  | -2.084748 | 0.000000 |
| 7 | 0.000000  | 4.260329  | 0.000000 |
| 5 | 0.000000  | 1.157317  | 0.000000 |
| 7 | -6.240389 | 2.170220  | 0.000000 |
| 7 | -4.999660 | 4.319225  | 0.000000 |
| 7 | -3.738983 | 6.414858  | 0.000000 |
| 7 | -3.740000 | 2.159290  | 0.000000 |
| 7 | -2.478065 | 4.266132  | 0.000000 |
| 7 | -1.242707 | 6.405242  | 0.000000 |
| 7 | -1.215847 | 2.063588  | 0.000000 |
| 5 | 7.476979  | 1.442976  | 0.000000 |
| 5 | 6.236252  | 3.600502  | 0.000000 |
| 5 | 4.988143  | 5.753765  | 0.000000 |
| 5 | 4.970951  | 1.443880  | 0.000000 |
| 1 | 3.730259  | 7.425017  | 0.000000 |
| 5 | 3.735912  | 3.583030  | 0.000000 |
| 5 | 2.481199  | 5.705662  | 0.000000 |
| 5 | 2.478787  | 1.431128  | 0.000000 |
| 1 | 1.237997  | 7.415569  | 0.000000 |
| 5 | 1.222078  | 3.501107  | 0.000000 |
| 5 | 0.000000  | -2.862257 | 0.000000 |
| 5 | 0.000000  | -7.201003 | 0.000000 |
| 5 | -6.181848 | -0.704049 | 0.000000 |
| 5 | -4.934468 | -2.848916 | 0.000000 |
| 5 | -3.700649 | -5.001613 | 0.000000 |
| 5 | -3.643087 | -0.692203 | 0.000000 |
| 5 | -2.488835 | -7.196742 | 0.000000 |
| 5 | -2.421008 | -2.808904 | 0.000000 |
| 5 | -1.235039 | -5.026910 | 0.000000 |
| 5 | -1.002266 | -0.578659 | 0.000000 |
| 5 | 6.181848  | -0.704049 | 0.000000 |
| 5 | 4.934468  | -2.848916 | 0.000000 |
| 5 | 3.700649  | -5.001613 | 0.000000 |
| 5 | 3.643087  | -0.692203 | 0.000000 |
| 5 | 2.488835  | -7.196742 | 0.000000 |
| 5 | 2.421008  | -2.808904 | 0.000000 |
| 5 | 1.235039  | -5.026910 | 0.000000 |
| 5 | 1.002266  | -0.578659 | 0.000000 |
| 5 | 0.000000  | 5.697833  | 0.000000 |
| 5 | -7.476979 | 1.442976  | 0.000000 |
| 5 | -6.236252 | 3.600502  | 0.000000 |
| 5 | -4.988143 | 5.753765  | 0.000000 |
| 5 | -4.970951 | 1.443880  | 0.000000 |
| 1 | -3.730259 | 7.425017  | 0.000000 |
| 5 | -3.735912 | 3.583030  | 0.000000 |
| 5 | -2.481199 | 5.705662  | 0.000000 |
| 5 | -2.478787 | 1.431128  | 0.000000 |
| 1 | -1.237997 | 7.415569  | 0.000000 |
| 5 | -1.222078 | 3.501107  | 0.000000 |
| 1 | 4.565124  | -6.943008 | 0.000000 |
| 1 | 5.803073  | -4.779922 | 0.000000 |
| 1 | 7.041070  | -2.635647 | 0.000000 |
| 1 | 8.295383  | -0.482009 | 0.000000 |
| 1 | 8.530740  | 2.013969  | 0.000000 |
| 1 | 7.273528  | 4.199373  | 0.000000 |
| 1 | 6.009518  | 6.380853  | 0.000000 |
| 1 | -6.009518 | 6.380853  | 0.000000 |
| 1 | -7.273528 | 4.199373  | 0.000000 |
| 1 | -8.530740 | 2.013969  | 0.000000 |
| 1 | -8.295383 | -0.482009 | 0.000000 |
| 1 | -7.041070 | -2.635647 | 0.000000 |
| 1 | -5.803073 | -4.779922 | 0.000000 |
| 1 | -4.565124 | -6.943008 | 0.000000 |

|   |           |           |          |
|---|-----------|-----------|----------|
| 1 | -2.521222 | -8.394822 | 0.000000 |
| 1 | 0.000000  | -8.398747 | 0.000000 |
| 1 | 2.521222  | -8.394822 | 0.000000 |

#P cam-b3lyp/6-31g\* opt

Full point group

D3H NOp 12

SCF Done: E(RCAM-B3LYP) = -2880.89254459 A.U. after 6 cycles

---

**3** CAM-B3LYP/6-31G\* (1)1A1'

|   |           |           |          |
|---|-----------|-----------|----------|
| 7 | 3.756274  | -2.168686 | 0.000000 |
| 7 | 2.469887  | -4.221535 | 0.000000 |
| 7 | 1.215972  | -2.052769 | 0.000000 |
| 7 | 0.000000  | 4.337372  | 0.000000 |
| 7 | -4.890900 | -0.028217 | 0.000000 |
| 7 | -3.651078 | 2.107951  | 0.000000 |
| 7 | -2.421013 | 4.249752  | 0.000000 |
| 7 | -2.385736 | -0.026678 | 0.000000 |
| 7 | -1.169764 | 2.079447  | 0.000000 |
| 7 | 4.890900  | -0.028217 | 0.000000 |
| 7 | 3.651078  | 2.107951  | 0.000000 |
| 7 | 2.421013  | 4.249752  | 0.000000 |
| 7 | 2.385736  | -0.026678 | 0.000000 |
| 7 | 1.169764  | 2.079447  | 0.000000 |
| 7 | 0.000000  | -4.215902 | 0.000000 |
| 7 | -3.756274 | -2.168686 | 0.000000 |
| 7 | -2.469887 | -4.221535 | 0.000000 |
| 7 | -1.215972 | -2.052769 | 0.000000 |
| 5 | 0.000000  | -1.150148 | 0.000000 |
| 5 | 4.979489  | -1.435417 | 0.000000 |
| 5 | 3.732852  | -3.594656 | 0.000000 |
| 5 | 2.483586  | -1.433899 | 0.000000 |
| 5 | 1.217969  | -3.486490 | 0.000000 |
| 5 | 0.000000  | 2.867798  | 0.000000 |
| 5 | -3.628373 | 0.688453  | 0.000000 |
| 5 | -2.410404 | 2.798037  | 0.000000 |
| 5 | -1.246637 | 5.030073  | 0.000000 |
| 5 | -0.996058 | 0.575074  | 0.000000 |
| 5 | 3.628373  | 0.688453  | 0.000000 |
| 5 | 2.410404  | 2.798037  | 0.000000 |
| 5 | 1.246637  | 5.030073  | 0.000000 |
| 5 | 0.996058  | 0.575074  | 0.000000 |
| 5 | -4.979489 | -1.435417 | 0.000000 |
| 5 | -3.732852 | -3.594656 | 0.000000 |
| 5 | -2.483586 | -1.433899 | 0.000000 |
| 5 | -1.217969 | -3.486490 | 0.000000 |
| 1 | 2.427326  | -5.230570 | 0.000000 |
| 1 | -5.743469 | 0.513159  | 0.000000 |
| 1 | -4.525219 | 2.612637  | 0.000000 |
| 1 | -3.316143 | 4.717410  | 0.000000 |
| 1 | 5.743469  | 0.513159  | 0.000000 |
| 1 | 4.525219  | 2.612637  | 0.000000 |
| 1 | 3.316143  | 4.717410  | 0.000000 |
| 1 | 0.000000  | -5.225273 | 0.000000 |
| 1 | -2.427326 | -5.230570 | 0.000000 |
| 1 | 6.046043  | -1.989721 | 0.000000 |
| 1 | 4.746170  | -4.241166 | 0.000000 |
| 1 | -1.299873 | 6.230887  | 0.000000 |
| 1 | 1.299873  | 6.230887  | 0.000000 |
| 1 | -6.046043 | -1.989721 | 0.000000 |
| 1 | -4.746170 | -4.241166 | 0.000000 |

```

#P cam-b3lyp/6-31G* opt
Full point group          D3H      NOp  12
SCF Done:  E(RCAM-B3LYP) = -1442.90595911  A.U. after 9 cycles

```

---

```

4 CAM-B3LYP/6-31G* (1)1A1'
7   6.231408  -2.163526   0.000000
7   4.989372  -4.314794   0.000000
7   3.738188  -6.453073   0.000000
7   3.737536  -2.157867   0.000000
7   2.476823  -4.272922   0.000000
7   1.244464  -6.442661   0.000000
7   1.215845  -2.066613   0.000000
7   0.000000   4.315735   0.000000
7  -7.457619  -0.010829   0.000000
7  -6.201740   2.143593   0.000000
7  -4.957276   4.299068   0.000000
7  -4.938871  -0.008531   0.000000
7  -3.719431   6.463902   0.000000
7  -3.696972   2.134448   0.000000
7  -2.462048   4.281453   0.000000
7  -2.397662  -0.019647   0.000000
7  -1.242036   6.478320   0.000000
7  -1.181816   2.086259   0.000000
7   7.457619  -0.010829   0.000000
7   6.201740   2.143593   0.000000
7   4.957276   4.299068   0.000000
7   4.938871  -0.008531   0.000000
7   3.719431   6.463902   0.000000
7   3.696972   2.134448   0.000000
7   2.462048   4.281453   0.000000
7   2.397662  -0.019647   0.000000
7   1.242036   6.478320   0.000000
7   1.181816   2.086259   0.000000
7   0.000000  -4.268896   0.000000
7  -6.231408  -2.163526   0.000000
7  -4.989372  -4.314794   0.000000
7  -3.738188  -6.453073   0.000000
7  -3.737536  -2.157867   0.000000
7  -2.476823  -4.272922   0.000000
7  -1.244464  -6.442661   0.000000
7  -1.215845  -2.066613   0.000000
7   8.735864  -2.174189   0.000000
7   7.492545  -4.325823   0.000000
7   6.250835  -6.478386   0.000000
7   0.000000   8.651646   0.000000
7  -2.485029   8.652575   0.000000
7   2.485029   8.652575   0.000000
7  -8.735864  -2.174189   0.000000
7  -7.492545  -4.325823   0.000000
7  -6.250835  -6.478386   0.000000
7   5.001770  -8.590956   0.000000
7   2.494925  -8.586305   0.000000
7   0.000000  -8.581669   0.000000
7  -8.683420   2.132484   0.000000
7  -9.940871  -0.036182   0.000000
7  -7.431943   4.290834   0.000000
7  -6.188495   6.453821   0.000000
7  -4.939101   8.627138   0.000000
7   9.940871  -0.036182   0.000000
7   8.683420   2.132484   0.000000

```

|   |           |           |          |
|---|-----------|-----------|----------|
| 7 | 7.431943  | 4.290834  | 0.000000 |
| 7 | 6.188495  | 6.453821  | 0.000000 |
| 7 | 4.939101  | 8.627138  | 0.000000 |
| 7 | -5.001770 | -8.590956 | 0.000000 |
| 7 | -2.494925 | -8.586305 | 0.000000 |
| 5 | 0.000000  | -1.159029 | 0.000000 |
| 5 | 7.471932  | -1.446096 | 0.000000 |
| 5 | 6.230589  | -3.597232 | 0.000000 |
| 5 | 4.988322  | -5.747835 | 0.000000 |
| 5 | 4.968628  | -1.441444 | 0.000000 |
| 5 | 3.732641  | -3.582236 | 0.000000 |
| 5 | 2.483507  | -5.712001 | 0.000000 |
| 5 | 2.477922  | -1.430629 | 0.000000 |
| 5 | 1.221960  | -3.505450 | 0.000000 |
| 5 | 0.000000  | 2.861258  | 0.000000 |
| 5 | 0.000000  | 7.194465  | 0.000000 |
| 5 | -6.188491 | 0.705220  | 0.000000 |
| 5 | -4.940756 | 2.852547  | 0.000000 |
| 5 | -3.704984 | 5.006781  | 0.000000 |
| 5 | -3.646789 | 0.694477  | 0.000000 |
| 5 | -2.483610 | 7.193931  | 0.000000 |
| 5 | -2.424829 | 2.810973  | 0.000000 |
| 5 | -1.235987 | 5.023680  | 0.000000 |
| 5 | -1.003749 | 0.579515  | 0.000000 |
| 5 | 6.188491  | 0.705220  | 0.000000 |
| 5 | 4.940756  | 2.852547  | 0.000000 |
| 5 | 3.704984  | 5.006781  | 0.000000 |
| 5 | 3.646789  | 0.694477  | 0.000000 |
| 5 | 2.483610  | 7.193931  | 0.000000 |
| 5 | 2.424829  | 2.810973  | 0.000000 |
| 5 | 1.235987  | 5.023680  | 0.000000 |
| 5 | 1.003749  | 0.579515  | 0.000000 |
| 5 | 0.000000  | -5.705094 | 0.000000 |
| 5 | -7.471932 | -1.446096 | 0.000000 |
| 5 | -6.230589 | -3.597232 | 0.000000 |
| 5 | -4.988322 | -5.747835 | 0.000000 |
| 5 | -4.968628 | -1.441444 | 0.000000 |
| 5 | -3.732641 | -3.582236 | 0.000000 |
| 5 | -2.483507 | -5.712001 | 0.000000 |
| 5 | -2.477922 | -1.430629 | 0.000000 |
| 5 | -1.221960 | -3.505450 | 0.000000 |
| 5 | 3.739994  | -7.894800 | 0.000000 |
| 5 | 1.246050  | -7.884710 | 0.000000 |
| 5 | -8.707095 | 0.708470  | 0.000000 |
| 5 | -7.451384 | 2.863244  | 0.000000 |
| 5 | -6.205334 | 5.021466  | 0.000000 |
| 5 | -4.967100 | 7.186330  | 0.000000 |
| 5 | 8.707095  | 0.708470  | 0.000000 |
| 5 | 7.451384  | 2.863244  | 0.000000 |
| 5 | 6.205334  | 5.021466  | 0.000000 |
| 5 | 4.967100  | 7.186330  | 0.000000 |
| 5 | -3.739994 | -7.894800 | 0.000000 |
| 5 | -1.246050 | -7.884710 | 0.000000 |
| 5 | 8.732140  | -3.605799 | 0.000000 |
| 5 | 9.978280  | -1.450511 | 0.000000 |
| 5 | 7.488783  | -5.759356 | 0.000000 |
| 5 | 6.245319  | -7.916189 | 0.000000 |
| 5 | -1.243357 | 9.365155  | 0.000000 |
| 5 | 1.243357  | 9.365155  | 0.000000 |
| 5 | -3.732961 | 9.366699  | 0.000000 |
| 5 | 3.732961  | 9.366699  | 0.000000 |
| 5 | -9.978280 | -1.450511 | 0.000000 |
| 5 | -8.732140 | -3.605799 | 0.000000 |

|   |            |           |          |
|---|------------|-----------|----------|
| 5 | -7.488783  | -5.759356 | 0.000000 |
| 5 | -6.245319  | -7.916189 | 0.000000 |
| 1 | 5.008067   | -9.601132 | 0.000000 |
| 1 | 2.489629   | -9.597049 | 0.000000 |
| 1 | 0.000000   | -9.592546 | 0.000000 |
| 1 | -9.556102  | 2.642443  | 0.000000 |
| 1 | -10.818858 | 0.463453  | 0.000000 |
| 1 | -8.307388  | 4.796273  | 0.000000 |
| 1 | -7.066474  | 6.954606  | 0.000000 |
| 1 | -5.810791  | 9.137679  | 0.000000 |
| 1 | 10.818858  | 0.463453  | 0.000000 |
| 1 | 9.556102   | 2.642443  | 0.000000 |
| 1 | 8.307388   | 4.796273  | 0.000000 |
| 1 | 7.066474   | 6.954606  | 0.000000 |
| 1 | 5.810791   | 9.137679  | 0.000000 |
| 1 | -5.008067  | -9.601132 | 0.000000 |
| 1 | -2.489629  | -9.597049 | 0.000000 |
| 1 | 9.767696   | -4.203496 | 0.000000 |
| 1 | 11.025961  | -2.029696 | 0.000000 |
| 1 | 8.524182   | -6.357325 | 0.000000 |
| 1 | 7.270749   | -8.533914 | 0.000000 |
| 1 | -1.243514  | 10.560821 | 0.000000 |
| 1 | 1.243514   | 10.560821 | 0.000000 |
| 1 | -3.755212  | 10.563611 | 0.000000 |
| 1 | 3.755212   | 10.563611 | 0.000000 |
| 1 | -11.025961 | -2.029696 | 0.000000 |
| 1 | -9.767696  | -4.203496 | 0.000000 |
| 1 | -8.524182  | -6.357325 | 0.000000 |
| 1 | -7.270749  | -8.533914 | 0.000000 |

#P cam-b3lyp/6-31g\* opt

Full point group

D3h

NOp

6 conv to D3h

SCF Done: E(RCAM-B3LYP) = -4797.06156136 A.U. after 6 cycles

---

P<sub>53</sub> HSE06 (1)1A1' optimized geometry, wavefunction analysis for (1)3B1

|   |          |           |           |
|---|----------|-----------|-----------|
| 7 | 0.000000 | 7.547336  | 9.913726  |
| 7 | 0.000000 | 7.554330  | 5.553327  |
| 7 | 0.000000 | 7.564891  | 1.203451  |
| 7 | 0.000000 | 8.799635  | 12.097189 |
| 7 | 0.000000 | 8.817038  | 7.742234  |
| 7 | 0.000000 | 8.827394  | 3.371403  |
| 7 | 0.000000 | 10.074955 | 9.956286  |
| 7 | 0.000000 | 10.082319 | 5.544104  |
| 7 | 0.000000 | 10.132079 | 1.192005  |
| 7 | 0.000000 | 11.321004 | 7.762991  |
| 7 | 0.000000 | 11.339178 | 12.183581 |
| 7 | 0.000000 | 11.373173 | 3.334590  |
| 7 | 0.000000 | 0.000000  | 9.962429  |
| 7 | 0.000000 | 0.000000  | 5.577399  |
| 7 | 0.000000 | 1.201515  | 3.334590  |
| 7 | 0.000000 | 1.235510  | 12.183581 |
| 7 | 0.000000 | 1.253684  | 7.762991  |
| 7 | 0.000000 | 2.442609  | 1.192005  |
| 7 | 0.000000 | 2.492369  | 5.544104  |
| 7 | 0.000000 | 2.499733  | 9.956286  |
| 7 | 0.000000 | 3.747294  | 3.371403  |
| 7 | 0.000000 | 3.757650  | 7.742234  |
| 7 | 0.000000 | 3.775053  | 12.097189 |
| 7 | 0.000000 | 5.009797  | 1.203451  |



|   |          |           |           |
|---|----------|-----------|-----------|
| 7 | 0.000000 | 5.020358  | 5.553327  |
| 7 | 0.000000 | 5.027352  | 9.913726  |
| 7 | 0.000000 | 6.287344  | 3.377435  |
| 7 | 0.000000 | 6.287344  | 7.731495  |
| 7 | 0.000000 | 6.287344  | 12.092157 |
| 5 | 0.000000 | 7.550901  | 8.460869  |
| 5 | 0.000000 | 7.549731  | 12.820473 |
| 5 | 0.000000 | 7.562470  | 4.092788  |
| 5 | 0.000000 | 8.805696  | 10.655350 |
| 5 | 0.000000 | 8.823368  | 6.276080  |
| 5 | 0.000000 | 8.864643  | 1.914964  |
| 5 | 0.000000 | 10.065827 | 12.832008 |
| 5 | 0.000000 | 10.071721 | 8.496383  |
| 5 | 0.000000 | 10.111116 | 4.063136  |
| 5 | 0.000000 | 11.325149 | 6.298497  |
| 5 | 0.000000 | 11.337281 | 10.725595 |
| 5 | 0.000000 | 11.516458 | 1.820937  |
| 5 | 0.000000 | 0.000000  | 8.504437  |
| 5 | 0.000000 | 0.000000  | 0.000030  |
| 5 | 0.000000 | 0.000000  | 4.109907  |
| 5 | 0.000000 | 1.058230  | 1.820937  |
| 5 | 0.000000 | 1.237407  | 10.725595 |
| 5 | 0.000000 | 1.249539  | 6.298497  |
| 5 | 0.000000 | 2.463572  | 4.063136  |
| 5 | 0.000000 | 2.502967  | 8.496383  |
| 5 | 0.000000 | 2.508861  | 12.832008 |
| 5 | 0.000000 | 3.710045  | 1.914964  |
| 5 | 0.000000 | 3.751320  | 6.276080  |
| 5 | 0.000000 | 3.768992  | 10.655350 |
| 5 | 0.000000 | 5.012218  | 4.092788  |
| 5 | 0.000000 | 5.024957  | 12.820473 |
| 5 | 0.000000 | 5.023787  | 8.460869  |
| 5 | 0.000000 | 6.287344  | 1.921368  |
| 5 | 0.000000 | 6.287344  | 6.274790  |
| 5 | 0.000000 | 6.287344  | 10.640867 |

E= -593.1388 eV

box: 15.000000 0 0 0 12.574688 0 0 0 13.068000

Kpoints: 1 1 1

basis: NGX= 112 NGY= 96 NGZ= 96 NGXf= 168 NGYf= 140 NGZf= 144

total occupation:

| Sym | alpha | beta  |
|-----|-------|-------|
| a1  | 48.00 | 47.00 |
| a2  | 12.00 | 12.00 |
| b1  | 18.00 | 17.00 |
| b2  | 41.00 | 41.00 |

Full wavefunction symmetry= B1, NUPDOWN= 2 NOPEN= 2

---

**P64** HSE06 (1)1A1' optimized geometry, wavefunction analysis for (1)3B1

|   |          |          |           |
|---|----------|----------|-----------|
| 7 | 0.000000 | 0.000000 | 13.842288 |
| 7 | 0.000000 | 0.000000 | 5.089951  |
| 7 | 0.000000 | 0.000000 | 9.459440  |
| 7 | 0.000000 | 7.544814 | 9.436586  |
| 7 | 0.000000 | 7.544814 | 5.074651  |
| 7 | 0.000000 | 7.544814 | 13.798175 |
| 7 | 0.000000 | 7.544814 | 0.729300  |
| 7 | 0.000000 | 8.804752 | 11.619243 |
| 7 | 0.000000 | 6.284875 | 11.619243 |
| 7 | 0.000000 | 8.807645 | 7.254254  |

|   |          |           |           |
|---|----------|-----------|-----------|
| 7 | 0.000000 | 6.281982  | 7.254254  |
| 7 | 0.000000 | 8.812816  | 2.898419  |
| 7 | 0.000000 | 6.276811  | 2.898419  |
| 7 | 0.000000 | 8.802919  | 15.978926 |
| 7 | 0.000000 | 6.286708  | 15.978926 |
| 7 | 0.000000 | 10.066570 | 9.441583  |
| 7 | 0.000000 | 5.023057  | 9.441583  |
| 7 | 0.000000 | 10.073186 | 5.070829  |
| 7 | 0.000000 | 5.016441  | 5.070829  |
| 7 | 0.000000 | 10.061733 | 13.803887 |
| 7 | 0.000000 | 5.027894  | 13.803887 |
| 7 | 0.000000 | 10.092335 | 0.727726  |
| 7 | 0.000000 | 4.997292  | 0.727726  |
| 7 | 0.000000 | 11.325291 | 11.637747 |
| 7 | 0.000000 | 3.764336  | 11.637747 |
| 7 | 0.000000 | 11.327737 | 7.253224  |
| 7 | 0.000000 | 3.761890  | 7.253224  |
| 7 | 0.000000 | 11.347696 | 2.890188  |
| 7 | 0.000000 | 3.741931  | 2.890188  |
| 7 | 0.000000 | 11.316347 | 15.980839 |
| 7 | 0.000000 | 3.773280  | 15.980839 |
| 7 | 0.000000 | 12.578248 | 9.453397  |
| 7 | 0.000000 | 2.511379  | 9.453397  |
| 7 | 0.000000 | 12.598307 | 5.057981  |
| 7 | 0.000000 | 2.491320  | 5.057981  |
| 7 | 0.000000 | 12.590277 | 13.839568 |
| 7 | 0.000000 | 2.499350  | 13.839568 |
| 7 | 0.000000 | 12.654722 | 0.714053  |
| 7 | 0.000000 | 2.434905  | 0.714053  |
| 7 | 0.000000 | 13.836040 | 11.646713 |
| 7 | 0.000000 | 1.253587  | 11.646713 |
| 7 | 0.000000 | 13.835157 | 7.271049  |
| 7 | 0.000000 | 1.254470  | 7.271049  |
| 7 | 0.000000 | 13.890568 | 2.847898  |
| 7 | 0.000000 | 1.199059  | 2.847898  |
| 7 | 0.000000 | 13.854814 | 16.062287 |
| 7 | 0.000000 | 1.234813  | 16.062287 |
| 5 | 0.000000 | 0.000000  | 3.623794  |
| 5 | 0.000000 | 0.000000  | 12.390970 |
| 5 | 0.000000 | 0.000000  | 8.000084  |
| 5 | 0.000000 | 7.544814  | 7.979498  |
| 5 | 0.000000 | 7.544814  | 12.347304 |
| 5 | 0.000000 | 7.544814  | 3.616864  |
| 5 | 0.000000 | 7.544814  | 16.702411 |
| 5 | 0.000000 | 8.805525  | 10.165691 |
| 5 | 0.000000 | 6.284102  | 10.165691 |
| 5 | 0.000000 | 8.811192  | 5.795165  |
| 5 | 0.000000 | 6.278435  | 5.795165  |
| 5 | 0.000000 | 8.804305  | 14.529332 |
| 5 | 0.000000 | 6.285322  | 14.529332 |
| 5 | 0.000000 | 8.822564  | 1.445137  |
| 5 | 0.000000 | 6.267063  | 1.445137  |
| 5 | 0.000000 | 10.069526 | 7.981540  |
| 5 | 0.000000 | 5.020101  | 7.981540  |
| 5 | 0.000000 | 10.063168 | 12.355765 |
| 5 | 0.000000 | 5.026459  | 12.355765 |
| 5 | 0.000000 | 10.086806 | 3.611116  |
| 5 | 0.000000 | 5.002821  | 3.611116  |
| 5 | 0.000000 | 10.069952 | 16.703644 |
| 5 | 0.000000 | 5.019675  | 16.703644 |
| 5 | 0.000000 | 11.323372 | 10.181779 |
| 5 | 0.000000 | 3.766255  | 10.181779 |
| 5 | 0.000000 | 11.340177 | 5.786931  |

|   |          |           |           |
|---|----------|-----------|-----------|
| 5 | 0.000000 | 3.749450  | 5.786931  |
| 5 | 0.000000 | 11.322801 | 14.541710 |
| 5 | 0.000000 | 3.766826  | 14.541710 |
| 5 | 0.000000 | 11.390783 | 1.436086  |
| 5 | 0.000000 | 3.698844  | 1.436086  |
| 5 | 0.000000 | 12.580553 | 7.993712  |
| 5 | 0.000000 | 2.509074  | 7.993712  |
| 5 | 0.000000 | 12.584803 | 12.385216 |
| 5 | 0.000000 | 2.504824  | 12.385216 |
| 5 | 0.000000 | 12.630997 | 3.577241  |
| 5 | 0.000000 | 2.458630  | 3.577241  |
| 5 | 0.000000 | 12.583575 | 16.712245 |
| 5 | 0.000000 | 2.506052  | 16.712245 |
| 5 | 0.000000 | 13.840401 | 5.806471  |
| 5 | 0.000000 | 1.249226  | 5.806471  |
| 5 | 0.000000 | 13.834400 | 10.191118 |
| 5 | 0.000000 | 1.255227  | 10.191118 |
| 5 | 0.000000 | 13.853240 | 14.608376 |
| 5 | 0.000000 | 1.236387  | 14.608376 |
| 5 | 0.000000 | 14.038216 | 1.337572  |
| 5 | 0.000000 | 1.051411  | 1.337572  |
| 5 | 0.000000 | 0.000000  | 16.947396 |

E= -960.8142 eV

box: 15.000000 0 0 0 15.089627 0 0 0 17.424000

Kpoints: 1 1 1

basis: NGX= 112 NGY= 112 NGZ= 128 NGXf= 168 NGYf= 168 NGZf= 192

total occupation:

| Sym | alpha | beta  |
|-----|-------|-------|
| a1  | 75.97 | 75.00 |
| a2  | 20.00 | 20.00 |
| b1  | 28.00 | 27.00 |
| b2  | 67.03 | 67.00 |

Full wavefunction symmetry= B1, NUPDOWN= 2 NOPEN= 2

Projection of occupied orbitals onto (1)1A1 orbitals: 379.23 occupied and 0.95 unoccupied

---

**P75** HSE06 (1)1A1' optimized geometry, wavefunction analysis for (1)3B1

|   |          |           |           |
|---|----------|-----------|-----------|
| 7 | 0.000000 | 8.802283  | 2.900712  |
| 7 | 0.000000 | 8.802283  | 7.254790  |
| 7 | 0.000000 | 8.802283  | 11.616811 |
| 7 | 0.000000 | 8.802283  | 15.976529 |
| 7 | 0.000000 | 8.802283  | 20.332494 |
| 7 | 0.000000 | 10.070476 | 0.727334  |
| 7 | 0.000000 | 10.064534 | 5.074672  |
| 7 | 0.000000 | 10.062101 | 9.435313  |
| 7 | 0.000000 | 10.061131 | 13.798657 |
| 7 | 0.000000 | 10.059867 | 18.155769 |
| 7 | 0.000000 | 11.320813 | 20.333239 |
| 7 | 0.000000 | 11.320176 | 15.981302 |
| 7 | 0.000000 | 11.321248 | 11.619805 |
| 7 | 0.000000 | 11.323643 | 7.253393  |
| 7 | 0.000000 | 11.333946 | 2.899068  |
| 7 | 0.000000 | 12.577738 | 18.161003 |
| 7 | 0.000000 | 12.580745 | 9.436462  |
| 7 | 0.000000 | 12.579761 | 13.807524 |
| 7 | 0.000000 | 12.589348 | 5.071031  |
| 7 | 0.000000 | 12.610506 | 0.726246  |
| 7 | 0.000000 | 13.833768 | 20.337028 |

|   |          |           |           |
|---|----------|-----------|-----------|
| 7 | 0.000000 | 13.835361 | 11.627216 |
| 7 | 0.000000 | 13.841233 | 15.998507 |
| 7 | 0.000000 | 13.842909 | 7.249978  |
| 7 | 0.000000 | 13.864482 | 2.888553  |
| 7 | 0.000000 | 15.091857 | 9.446296  |
| 7 | 0.000000 | 15.093060 | 13.816026 |
| 7 | 0.000000 | 15.106578 | 18.198328 |
| 7 | 0.000000 | 15.113436 | 5.055228  |
| 7 | 0.000000 | 15.170818 | 0.713126  |
| 7 | 0.000000 | 16.348319 | 11.633654 |
| 7 | 0.000000 | 16.349528 | 7.264566  |
| 7 | 0.000000 | 16.351102 | 16.006171 |
| 7 | 0.000000 | 16.373210 | 20.419990 |
| 7 | 0.000000 | 16.405378 | 2.846399  |
| 7 | 0.000000 | 0.000000  | 9.449327  |
| 7 | 0.000000 | 0.000000  | 5.086013  |
| 7 | 0.000000 | 0.000000  | 13.818957 |
| 7 | 0.000000 | 0.000000  | 18.200516 |
| 7 | 0.000000 | 1.199187  | 2.846399  |
| 7 | 0.000000 | 1.231355  | 20.419990 |
| 7 | 0.000000 | 1.253463  | 16.006171 |
| 7 | 0.000000 | 1.255037  | 7.264566  |
| 7 | 0.000000 | 1.256246  | 11.633654 |
| 7 | 0.000000 | 2.433747  | 0.713126  |
| 7 | 0.000000 | 2.491129  | 5.055228  |
| 7 | 0.000000 | 2.497987  | 18.198328 |
| 7 | 0.000000 | 2.512708  | 9.446296  |
| 7 | 0.000000 | 2.511505  | 13.816026 |
| 7 | 0.000000 | 3.740083  | 2.888553  |
| 7 | 0.000000 | 3.761656  | 7.249978  |
| 7 | 0.000000 | 3.763332  | 15.998507 |
| 7 | 0.000000 | 3.769204  | 11.627216 |
| 7 | 0.000000 | 3.770797  | 20.337028 |
| 7 | 0.000000 | 4.994059  | 0.726246  |
| 7 | 0.000000 | 5.015217  | 5.071031  |
| 7 | 0.000000 | 5.023820  | 9.436462  |
| 7 | 0.000000 | 5.024804  | 13.807524 |
| 7 | 0.000000 | 5.026827  | 18.161003 |
| 7 | 0.000000 | 6.270619  | 2.899068  |
| 7 | 0.000000 | 6.280922  | 7.253393  |
| 7 | 0.000000 | 6.283317  | 11.619805 |
| 7 | 0.000000 | 6.284389  | 15.981302 |
| 7 | 0.000000 | 6.283752  | 20.333239 |
| 7 | 0.000000 | 7.534089  | 0.727334  |
| 7 | 0.000000 | 7.542464  | 9.435313  |
| 7 | 0.000000 | 7.540031  | 5.074672  |
| 7 | 0.000000 | 7.543434  | 13.798657 |
| 7 | 0.000000 | 7.544698  | 18.155769 |
| 5 | 0.000000 | 8.802283  | 1.447031  |
| 5 | 0.000000 | 8.802283  | 5.797259  |
| 5 | 0.000000 | 8.802283  | 10.161482 |
| 5 | 0.000000 | 8.802283  | 14.526282 |
| 5 | 0.000000 | 8.802283  | 18.882835 |
| 5 | 0.000000 | 10.070158 | 3.618648  |
| 5 | 0.000000 | 10.063868 | 7.978402  |
| 5 | 0.000000 | 10.061597 | 12.345613 |
| 5 | 0.000000 | 10.061159 | 16.706957 |
| 5 | 0.000000 | 10.065120 | 21.056768 |
| 5 | 0.000000 | 11.321567 | 18.885529 |
| 5 | 0.000000 | 11.322303 | 10.163010 |
| 5 | 0.000000 | 11.320006 | 14.531194 |
| 5 | 0.000000 | 11.329939 | 5.794601  |
| 5 | 0.000000 | 11.346758 | 1.445509  |

|   |          |           |           |
|---|----------|-----------|-----------|
| 5 | 0.000000 | 12.579512 | 16.715976 |
| 5 | 0.000000 | 12.578585 | 12.353688 |
| 5 | 0.000000 | 12.585510 | 7.976406  |
| 5 | 0.000000 | 12.588505 | 21.059124 |
| 5 | 0.000000 | 12.606943 | 3.611446  |
| 5 | 0.000000 | 13.839413 | 18.899253 |
| 5 | 0.000000 | 13.836080 | 10.170595 |
| 5 | 0.000000 | 13.838025 | 14.546292 |
| 5 | 0.000000 | 13.856764 | 5.783920  |
| 5 | 0.000000 | 13.908919 | 1.435067  |
| 5 | 0.000000 | 15.092052 | 12.361924 |
| 5 | 0.000000 | 15.095660 | 7.985850  |
| 5 | 0.000000 | 15.101287 | 21.068507 |
| 5 | 0.000000 | 15.101036 | 16.746519 |
| 5 | 0.000000 | 15.147243 | 3.574854  |
| 5 | 0.000000 | 16.348631 | 10.176339 |
| 5 | 0.000000 | 16.349409 | 14.554222 |
| 5 | 0.000000 | 16.355674 | 5.800630  |
| 5 | 0.000000 | 16.369505 | 18.967920 |
| 5 | 0.000000 | 16.554415 | 1.337054  |
| 5 | 0.000000 | 0.000000  | 7.989343  |
| 5 | 0.000000 | 0.000000  | 3.621007  |
| 5 | 0.000000 | 0.000000  | 12.365043 |
| 5 | 0.000000 | 0.000000  | 16.751958 |
| 5 | 0.000000 | 0.000000  | 21.306485 |
| 5 | 0.000000 | 1.050150  | 1.337054  |
| 5 | 0.000000 | 1.235060  | 18.967920 |
| 5 | 0.000000 | 1.248891  | 5.800630  |
| 5 | 0.000000 | 1.255934  | 10.176339 |
| 5 | 0.000000 | 1.255156  | 14.554222 |
| 5 | 0.000000 | 2.457322  | 3.574854  |
| 5 | 0.000000 | 2.503529  | 16.746519 |
| 5 | 0.000000 | 2.503278  | 21.068507 |
| 5 | 0.000000 | 2.508905  | 7.985850  |
| 5 | 0.000000 | 2.512513  | 12.361924 |
| 5 | 0.000000 | 3.695646  | 1.435067  |
| 5 | 0.000000 | 3.747801  | 5.783920  |
| 5 | 0.000000 | 3.766540  | 14.546292 |
| 5 | 0.000000 | 3.768485  | 10.170595 |
| 5 | 0.000000 | 3.765152  | 18.899253 |
| 5 | 0.000000 | 4.997622  | 3.611446  |
| 5 | 0.000000 | 5.016060  | 21.059124 |
| 5 | 0.000000 | 5.019055  | 7.976406  |
| 5 | 0.000000 | 5.025980  | 12.353688 |
| 5 | 0.000000 | 5.025053  | 16.715976 |
| 5 | 0.000000 | 6.257807  | 1.445509  |
| 5 | 0.000000 | 6.274626  | 5.794601  |
| 5 | 0.000000 | 6.284559  | 14.531194 |
| 5 | 0.000000 | 6.282262  | 10.163010 |
| 5 | 0.000000 | 6.282998  | 18.885529 |
| 5 | 0.000000 | 7.534407  | 3.618648  |
| 5 | 0.000000 | 7.542968  | 12.345613 |
| 5 | 0.000000 | 7.540697  | 7.978402  |
| 5 | 0.000000 | 7.543406  | 16.706957 |
| 5 | 0.000000 | 7.539445  | 21.056768 |

E=-1410.1872 eV

box: 15.000000 0 0 0 17.604565 0 0 0 21.780001

Kpoints: 1 1 1

basis: NGX= 112 NGY= 128 NGZ= 160 NGXF= 168 NGYF= 192 NGZF= 240

total occupation:

Sym alpha beta

a1 109.84 109.00



```

a2    30.00    30.00
b1    40.00    39.00
b2    99.16    99.00
Full wavefunction symmetry= B1,    NUPDOWN=          2    NOPEN=          2

```

---

**P53** CAM-B3LYP (1)1A1' optimized geometry, wavefunction analysis for (1)3B1

|   |          |           |           |
|---|----------|-----------|-----------|
| 7 | 0.000000 | 7.547336  | 9.913726  |
| 7 | 0.000000 | 7.554330  | 5.553327  |
| 7 | 0.000000 | 7.564891  | 1.203451  |
| 7 | 0.000000 | 8.799635  | 12.097189 |
| 7 | 0.000000 | 8.817038  | 7.742234  |
| 7 | 0.000000 | 8.827394  | 3.371403  |
| 7 | 0.000000 | 10.074955 | 9.956286  |
| 7 | 0.000000 | 10.082319 | 5.544104  |
| 7 | 0.000000 | 10.132079 | 1.192005  |
| 7 | 0.000000 | 11.321004 | 7.762991  |
| 7 | 0.000000 | 11.339178 | 12.183581 |
| 7 | 0.000000 | 11.373173 | 3.334590  |
| 7 | 0.000000 | 0.000000  | 9.962429  |
| 7 | 0.000000 | 0.000000  | 5.577399  |
| 7 | 0.000000 | 1.201515  | 3.334590  |
| 7 | 0.000000 | 1.235510  | 12.183581 |
| 7 | 0.000000 | 1.253684  | 7.762991  |
| 7 | 0.000000 | 2.442609  | 1.192005  |
| 7 | 0.000000 | 2.492369  | 5.544104  |
| 7 | 0.000000 | 2.499733  | 9.956286  |
| 7 | 0.000000 | 3.747294  | 3.371403  |
| 7 | 0.000000 | 3.757650  | 7.742234  |
| 7 | 0.000000 | 3.775053  | 12.097189 |
| 7 | 0.000000 | 5.009797  | 1.203451  |
| 7 | 0.000000 | 5.020358  | 5.553327  |
| 7 | 0.000000 | 5.027352  | 9.913726  |
| 7 | 0.000000 | 6.287344  | 3.377435  |
| 7 | 0.000000 | 6.287344  | 7.731495  |
| 7 | 0.000000 | 6.287344  | 12.092157 |
| 5 | 0.000000 | 7.550901  | 8.460869  |
| 5 | 0.000000 | 7.549731  | 12.820473 |
| 5 | 0.000000 | 7.562470  | 4.092788  |
| 5 | 0.000000 | 8.805696  | 10.655350 |
| 5 | 0.000000 | 8.823368  | 6.276080  |
| 5 | 0.000000 | 8.864643  | 1.914964  |
| 5 | 0.000000 | 10.065827 | 12.832008 |
| 5 | 0.000000 | 10.071721 | 8.496383  |
| 5 | 0.000000 | 10.111116 | 4.063136  |
| 5 | 0.000000 | 11.325149 | 6.298497  |
| 5 | 0.000000 | 11.337281 | 10.725595 |
| 5 | 0.000000 | 11.516458 | 1.820937  |
| 5 | 0.000000 | 0.000000  | 8.504437  |
| 5 | 0.000000 | 0.000000  | 0.000030  |
| 5 | 0.000000 | 0.000000  | 4.109907  |
| 5 | 0.000000 | 1.058230  | 1.820937  |
| 5 | 0.000000 | 1.237407  | 10.725595 |
| 5 | 0.000000 | 1.249539  | 6.298497  |
| 5 | 0.000000 | 2.463572  | 4.063136  |
| 5 | 0.000000 | 2.502967  | 8.496383  |
| 5 | 0.000000 | 2.508861  | 12.832008 |
| 5 | 0.000000 | 3.710045  | 1.914964  |
| 5 | 0.000000 | 3.751320  | 6.276080  |
| 5 | 0.000000 | 3.768992  | 10.655350 |
| 5 | 0.000000 | 5.012218  | 4.092788  |

|   |          |          |           |
|---|----------|----------|-----------|
| 5 | 0.000000 | 5.024957 | 12.820473 |
| 5 | 0.000000 | 5.023787 | 8.460869  |
| 5 | 0.000000 | 6.287344 | 1.921368  |
| 5 | 0.000000 | 6.287344 | 6.274790  |
| 5 | 0.000000 | 6.287344 | 10.640867 |

E=-1012.0805 eV  
box: 15.000000 0 0 0 12.574688 0 0 0 13.068000  
Kpoints: 1 1 1  
basis: NGX= 112 NGY= 96 NGZ= 98 NGXF= 168 NGYF= 192 NGZF= 196  
Sym alpha beta  
a1 48.00 47.00  
a2 12.00 12.00  
b1 18.00 17.00  
b2 41.00 41.00  
Full wavefunction symmetry= B1, NUPDOWN= 2 NOPEN= 2

---

**P64** CAM-B3LYP (1)1A1' optimized geometry, wavefunction analysis for (1)3B1

|   |          |           |           |
|---|----------|-----------|-----------|
| 7 | 0.000000 | 0.000000  | 5.067367  |
| 7 | 0.000000 | 0.000000  | 13.610362 |
| 7 | 0.000000 | 0.000000  | 0.737847  |
| 7 | 0.000000 | 7.442601  | 0.713036  |
| 7 | 0.000000 | 7.442601  | 13.597526 |
| 7 | 0.000000 | 7.442601  | 5.018241  |
| 7 | 0.000000 | 7.442601  | 9.313487  |
| 7 | 0.000000 | 8.685447  | 2.868289  |
| 7 | 0.000000 | 6.199755  | 2.868289  |
| 7 | 0.000000 | 8.689360  | 15.747125 |
| 7 | 0.000000 | 6.195841  | 15.747125 |
| 7 | 0.000000 | 8.695209  | 11.453341 |
| 7 | 0.000000 | 6.189993  | 11.453341 |
| 7 | 0.000000 | 8.684592  | 7.170239  |
| 7 | 0.000000 | 6.200609  | 7.170239  |
| 7 | 0.000000 | 9.930702  | 0.719913  |
| 7 | 0.000000 | 4.954500  | 0.719913  |
| 7 | 0.000000 | 9.938112  | 13.594680 |
| 7 | 0.000000 | 4.947090  | 13.594680 |
| 7 | 0.000000 | 9.926879  | 5.022819  |
| 7 | 0.000000 | 4.958323  | 5.022819  |
| 7 | 0.000000 | 9.957331  | 9.312150  |
| 7 | 0.000000 | 4.927871  | 9.312150  |
| 7 | 0.000000 | 11.172460 | 2.886578  |
| 7 | 0.000000 | 3.712742  | 2.886578  |
| 7 | 0.000000 | 11.175910 | 15.746987 |
| 7 | 0.000000 | 3.709292  | 15.746987 |
| 7 | 0.000000 | 11.197361 | 11.443337 |
| 7 | 0.000000 | 3.687840  | 11.443337 |
| 7 | 0.000000 | 11.166729 | 7.172949  |
| 7 | 0.000000 | 3.718473  | 7.172949  |
| 7 | 0.000000 | 12.408749 | 0.732270  |
| 7 | 0.000000 | 2.476453  | 0.732270  |
| 7 | 0.000000 | 12.428711 | 13.579247 |
| 7 | 0.000000 | 2.456491  | 13.579247 |
| 7 | 0.000000 | 12.421876 | 5.061343  |
| 7 | 0.000000 | 2.463325  | 5.061343  |
| 7 | 0.000000 | 12.492720 | 9.294466  |
| 7 | 0.000000 | 2.392482  | 9.294466  |
| 7 | 0.000000 | 13.649031 | 2.897440  |
| 7 | 0.000000 | 1.236170  | 2.897440  |
| 7 | 0.000000 | 13.645774 | 15.764055 |

|   |          |           |           |
|---|----------|-----------|-----------|
| 7 | 0.000000 | 1.239428  | 15.764055 |
| 7 | 0.000000 | 13.712851 | 11.399215 |
| 7 | 0.000000 | 1.172351  | 11.399215 |
| 7 | 0.000000 | 13.667596 | 7.262775  |
| 7 | 0.000000 | 1.217606  | 7.262775  |
| 5 | 0.000000 | 0.000000  | 12.159891 |
| 5 | 0.000000 | 0.000000  | 3.624391  |
| 5 | 0.000000 | 0.000000  | 16.479931 |
| 5 | 0.000000 | 7.442601  | 16.462935 |
| 5 | 0.000000 | 7.442601  | 3.585986  |
| 5 | 0.000000 | 7.442601  | 12.159157 |
| 5 | 0.000000 | 7.442601  | 7.878166  |
| 5 | 0.000000 | 8.686112  | 1.433557  |
| 5 | 0.000000 | 6.199090  | 1.433557  |
| 5 | 0.000000 | 8.691288  | 14.309032 |
| 5 | 0.000000 | 6.193914  | 14.309032 |
| 5 | 0.000000 | 8.685202  | 5.737292  |
| 5 | 0.000000 | 6.200000  | 5.737292  |
| 5 | 0.000000 | 8.702511  | 10.015240 |
| 5 | 0.000000 | 6.182691  | 10.015240 |
| 5 | 0.000000 | 9.933173  | 16.464434 |
| 5 | 0.000000 | 4.952029  | 16.464434 |
| 5 | 0.000000 | 9.926573  | 3.593847  |
| 5 | 0.000000 | 4.958629  | 3.593847  |
| 5 | 0.000000 | 9.947602  | 12.154286 |
| 5 | 0.000000 | 4.937600  | 12.154286 |
| 5 | 0.000000 | 9.933331  | 7.878842  |
| 5 | 0.000000 | 4.951871  | 7.878842  |
| 5 | 0.000000 | 11.170492 | 1.449041  |
| 5 | 0.000000 | 3.714710  | 1.449041  |
| 5 | 0.000000 | 11.185893 | 14.299932 |
| 5 | 0.000000 | 3.699309  | 14.299932 |
| 5 | 0.000000 | 11.167996 | 5.748900  |
| 5 | 0.000000 | 3.717206  | 5.748900  |
| 5 | 0.000000 | 11.241200 | 10.006724 |
| 5 | 0.000000 | 3.644002  | 10.006724 |
| 5 | 0.000000 | 12.410909 | 16.475484 |
| 5 | 0.000000 | 2.474293  | 16.475484 |
| 5 | 0.000000 | 12.413937 | 3.621466  |
| 5 | 0.000000 | 2.471265  | 3.621466  |
| 5 | 0.000000 | 12.460428 | 12.115053 |
| 5 | 0.000000 | 2.424774  | 12.115053 |
| 5 | 0.000000 | 12.418877 | 7.889667  |
| 5 | 0.000000 | 2.466325  | 7.889667  |
| 5 | 0.000000 | 13.653805 | 14.318055 |
| 5 | 0.000000 | 1.231397  | 14.318055 |
| 5 | 0.000000 | 13.647280 | 1.456008  |
| 5 | 0.000000 | 1.237922  | 1.456008  |
| 5 | 0.000000 | 13.668545 | 5.819054  |
| 5 | 0.000000 | 1.216657  | 5.819054  |
| 5 | 0.000000 | 13.867324 | 9.900457  |
| 5 | 0.000000 | 1.017878  | 9.900457  |
| 5 | 0.000000 | 0.000000  | 8.144234  |

E=-1968.5105 eV

box: 15.000000 0 0 0 14.885202 0 0 0 17.185348

Kpoints: 1 1 1

basis: NGX= 112 NGY= 112 NGZ= 126 NGXF= 168 NGYF= 162 NGZF= 192

| Sym | alpha | beta  |
|-----|-------|-------|
| a1  | 76.00 | 75.00 |
| a2  | 20.00 | 20.00 |
| b1  | 28.00 | 27.00 |
| b2  | 67.00 | 67.00 |

---

**P75** CAM-B3LYP (1)1A1' optimized geometry, wavefunction analysis for (1)3B1

|   |          |           |           |
|---|----------|-----------|-----------|
| 7 | 0.000000 | 8.802283  | 2.900712  |
| 7 | 0.000000 | 8.802283  | 7.254790  |
| 7 | 0.000000 | 8.802283  | 11.616811 |
| 7 | 0.000000 | 8.802283  | 15.976529 |
| 7 | 0.000000 | 8.802283  | 20.332494 |
| 7 | 0.000000 | 10.070476 | 0.727334  |
| 7 | 0.000000 | 10.064534 | 5.074672  |
| 7 | 0.000000 | 10.062101 | 9.435313  |
| 7 | 0.000000 | 10.061131 | 13.798657 |
| 7 | 0.000000 | 10.059867 | 18.155769 |
| 7 | 0.000000 | 11.320813 | 20.333239 |
| 7 | 0.000000 | 11.320176 | 15.981302 |
| 7 | 0.000000 | 11.321248 | 11.619805 |
| 7 | 0.000000 | 11.323643 | 7.253393  |
| 7 | 0.000000 | 11.333946 | 2.899068  |
| 7 | 0.000000 | 12.577738 | 18.161003 |
| 7 | 0.000000 | 12.580745 | 9.436462  |
| 7 | 0.000000 | 12.579761 | 13.807524 |
| 7 | 0.000000 | 12.589348 | 5.071031  |
| 7 | 0.000000 | 12.610506 | 0.726246  |
| 7 | 0.000000 | 13.833768 | 20.337028 |
| 7 | 0.000000 | 13.835361 | 11.627216 |
| 7 | 0.000000 | 13.841233 | 15.998507 |
| 7 | 0.000000 | 13.842909 | 7.249978  |
| 7 | 0.000000 | 13.864482 | 2.888553  |
| 7 | 0.000000 | 15.091857 | 9.446296  |
| 7 | 0.000000 | 15.093060 | 13.816026 |
| 7 | 0.000000 | 15.106578 | 18.198328 |
| 7 | 0.000000 | 15.113436 | 5.055228  |
| 7 | 0.000000 | 15.170818 | 0.713126  |
| 7 | 0.000000 | 16.348319 | 11.633654 |
| 7 | 0.000000 | 16.349528 | 7.264566  |
| 7 | 0.000000 | 16.351102 | 16.006171 |
| 7 | 0.000000 | 16.373210 | 20.419990 |
| 7 | 0.000000 | 16.405378 | 2.846399  |
| 7 | 0.000000 | 0.000000  | 9.449327  |
| 7 | 0.000000 | 0.000000  | 5.086013  |
| 7 | 0.000000 | 0.000000  | 13.818957 |
| 7 | 0.000000 | 0.000000  | 18.200516 |
| 7 | 0.000000 | 1.199187  | 2.846399  |
| 7 | 0.000000 | 1.231355  | 20.419990 |
| 7 | 0.000000 | 1.253463  | 16.006171 |
| 7 | 0.000000 | 1.255037  | 7.264566  |
| 7 | 0.000000 | 1.256246  | 11.633654 |
| 7 | 0.000000 | 2.433747  | 0.713126  |
| 7 | 0.000000 | 2.491129  | 5.055228  |
| 7 | 0.000000 | 2.497987  | 18.198328 |
| 7 | 0.000000 | 2.512708  | 9.446296  |
| 7 | 0.000000 | 2.511505  | 13.816026 |
| 7 | 0.000000 | 3.740083  | 2.888553  |
| 7 | 0.000000 | 3.761656  | 7.249978  |
| 7 | 0.000000 | 3.763332  | 15.998507 |
| 7 | 0.000000 | 3.769204  | 11.627216 |
| 7 | 0.000000 | 3.770797  | 20.337028 |
| 7 | 0.000000 | 4.994059  | 0.726246  |
| 7 | 0.000000 | 5.015217  | 5.071031  |
| 7 | 0.000000 | 5.023820  | 9.436462  |

|   |          |           |           |
|---|----------|-----------|-----------|
| 7 | 0.000000 | 5.024804  | 13.807524 |
| 7 | 0.000000 | 5.026827  | 18.161003 |
| 7 | 0.000000 | 6.270619  | 2.899068  |
| 7 | 0.000000 | 6.280922  | 7.253393  |
| 7 | 0.000000 | 6.283317  | 11.619805 |
| 7 | 0.000000 | 6.284389  | 15.981302 |
| 7 | 0.000000 | 6.283752  | 20.333239 |
| 7 | 0.000000 | 7.534089  | 0.727334  |
| 7 | 0.000000 | 7.542464  | 9.435313  |
| 7 | 0.000000 | 7.540031  | 5.074672  |
| 7 | 0.000000 | 7.543434  | 13.798657 |
| 7 | 0.000000 | 7.544698  | 18.155769 |
| 5 | 0.000000 | 8.802283  | 1.447031  |
| 5 | 0.000000 | 8.802283  | 5.797259  |
| 5 | 0.000000 | 8.802283  | 10.161482 |
| 5 | 0.000000 | 8.802283  | 14.526282 |
| 5 | 0.000000 | 8.802283  | 18.882835 |
| 5 | 0.000000 | 10.070158 | 3.618648  |
| 5 | 0.000000 | 10.063868 | 7.978402  |
| 5 | 0.000000 | 10.061597 | 12.345613 |
| 5 | 0.000000 | 10.061159 | 16.706957 |
| 5 | 0.000000 | 10.065120 | 21.056768 |
| 5 | 0.000000 | 11.321567 | 18.885529 |
| 5 | 0.000000 | 11.322303 | 10.163010 |
| 5 | 0.000000 | 11.320006 | 14.531194 |
| 5 | 0.000000 | 11.329939 | 5.794601  |
| 5 | 0.000000 | 11.346758 | 1.445509  |
| 5 | 0.000000 | 12.579512 | 16.715976 |
| 5 | 0.000000 | 12.578585 | 12.353688 |
| 5 | 0.000000 | 12.585510 | 7.976406  |
| 5 | 0.000000 | 12.588505 | 21.059124 |
| 5 | 0.000000 | 12.606943 | 3.611446  |
| 5 | 0.000000 | 13.839413 | 18.899253 |
| 5 | 0.000000 | 13.836080 | 10.170595 |
| 5 | 0.000000 | 13.838025 | 14.546292 |
| 5 | 0.000000 | 13.856764 | 5.783920  |
| 5 | 0.000000 | 13.908919 | 1.435067  |
| 5 | 0.000000 | 15.092052 | 12.361924 |
| 5 | 0.000000 | 15.095660 | 7.985850  |
| 5 | 0.000000 | 15.101287 | 21.068507 |
| 5 | 0.000000 | 15.101036 | 16.746519 |
| 5 | 0.000000 | 15.147243 | 3.574854  |
| 5 | 0.000000 | 16.348631 | 10.176339 |
| 5 | 0.000000 | 16.349409 | 14.554222 |
| 5 | 0.000000 | 16.355674 | 5.800630  |
| 5 | 0.000000 | 16.369505 | 18.967920 |
| 5 | 0.000000 | 16.554415 | 1.337054  |
| 5 | 0.000000 | 0.000000  | 7.989343  |
| 5 | 0.000000 | 0.000000  | 3.621007  |
| 5 | 0.000000 | 0.000000  | 12.365043 |
| 5 | 0.000000 | 0.000000  | 16.751958 |
| 5 | 0.000000 | 0.000000  | 21.306485 |
| 5 | 0.000000 | 1.050150  | 1.337054  |
| 5 | 0.000000 | 1.235060  | 18.967920 |
| 5 | 0.000000 | 1.248891  | 5.800630  |
| 5 | 0.000000 | 1.255934  | 10.176339 |
| 5 | 0.000000 | 1.255156  | 14.554222 |
| 5 | 0.000000 | 2.457322  | 3.574854  |
| 5 | 0.000000 | 2.503529  | 16.746519 |
| 5 | 0.000000 | 2.503278  | 21.068507 |
| 5 | 0.000000 | 2.508905  | 7.985850  |
| 5 | 0.000000 | 2.512513  | 12.361924 |
| 5 | 0.000000 | 3.695646  | 1.435067  |

|   |          |          |           |
|---|----------|----------|-----------|
| 5 | 0.000000 | 3.747801 | 5.783920  |
| 5 | 0.000000 | 3.766540 | 14.546292 |
| 5 | 0.000000 | 3.768485 | 10.170595 |
| 5 | 0.000000 | 3.765152 | 18.899253 |
| 5 | 0.000000 | 4.997622 | 3.611446  |
| 5 | 0.000000 | 5.016060 | 21.059124 |
| 5 | 0.000000 | 5.019055 | 7.976406  |
| 5 | 0.000000 | 5.025980 | 12.353688 |
| 5 | 0.000000 | 5.025053 | 16.715976 |
| 5 | 0.000000 | 6.257807 | 1.445509  |
| 5 | 0.000000 | 6.274626 | 5.794601  |
| 5 | 0.000000 | 6.284559 | 14.531194 |
| 5 | 0.000000 | 6.282262 | 10.163010 |
| 5 | 0.000000 | 6.282998 | 18.885529 |
| 5 | 0.000000 | 7.534407 | 3.618648  |
| 5 | 0.000000 | 7.542968 | 12.345613 |
| 5 | 0.000000 | 7.540697 | 7.978402  |
| 5 | 0.000000 | 7.543406 | 16.706957 |
| 5 | 0.000000 | 7.539445 | 21.056768 |

E=-2633.9578 eV

box: 15.000000 0 0 0 17.604565 0 0 0 21.780001

Kpoints: 1 1 1

basis: NGX= 112 NGY= 128 NGZ= 160 NGXF= 168 NGYF= 192 NGZF= 240

Sym alpha beta

a1 110.00 109.00

a2 30.00 30.00

b1 40.00 39.00

b2 99.00 99.00

Full wavefunction symmetry= B1, NUPDOWN= 2 NOPEN= 2

---

Al2O3 CAM-B3LYP

|    |           |          |           |
|----|-----------|----------|-----------|
| 13 | 0.000000  | 0.000000 | 1.922137  |
| 13 | 0.000000  | 2.749269 | 0.244134  |
| 13 | 0.000000  | 2.749269 | 4.088408  |
| 13 | 2.380937  | 1.374635 | 2.410405  |
| 13 | 2.380937  | 1.374635 | 6.254679  |
| 13 | 0.000000  | 0.000000 | 4.576676  |
| 13 | 0.000000  | 0.000000 | 8.420950  |
| 13 | 0.000000  | 2.749269 | 6.742947  |
| 13 | 0.000000  | 2.749269 | 10.587221 |
| 13 | 2.380937  | 1.374635 | 8.909218  |
| 13 | 2.380937  | 1.374635 | 12.753492 |
| 13 | 0.000000  | 0.000000 | 11.075489 |
| 8  | 3.302766  | 0.000000 | 3.249406  |
| 8  | 1.651383  | 0.111010 | 1.083135  |
| 8  | 0.729554  | 1.263625 | 3.249406  |
| 8  | -1.651383 | 2.860279 | 3.249406  |
| 8  | 1.651383  | 2.638260 | 1.083135  |
| 8  | 3.840045  | 1.374635 | 1.083135  |
| 8  | 0.921829  | 1.374635 | 7.581948  |
| 8  | -0.729554 | 1.485645 | 5.415677  |
| 8  | 3.110491  | 2.638260 | 7.581948  |
| 8  | 3.110491  | 0.111010 | 7.581948  |
| 8  | -0.729554 | 4.012894 | 5.415677  |
| 8  | 1.459108  | 2.749269 | 5.415677  |
| 8  | -1.459108 | 2.749269 | 11.914490 |
| 8  | 1.651383  | 2.860279 | 9.748219  |
| 8  | 0.729554  | 4.012894 | 11.914490 |
| 8  | 0.729554  | 1.485645 | 11.914490 |
| 8  | -0.729554 | 1.263625 | 9.748219  |

```

      8      1.459108      0.000000      9.748219
E= -307.2240 eV
box:   4.761874 0 0  -2.380937   4.123904 0 0 0  12.997626
Kpoints: 6 6 4
basis: NGX= 36 NGY= 36 NGZ= 48 NGXF= 72 NGYF= 72 NGZF= 96

```

---

```

      AlAs  CAM-B3LYP
13      0.000000      0.000000      0.000000
13      0.000000      2.831784      2.831784
13      2.831784      0.000000      2.831784
13      2.831784      2.831784      0.000000
33      4.247675      1.415892      4.247675
33      4.247675      4.247675      1.415892
33      1.415892      1.415892      1.415892
33      1.415892      4.247675      4.247675

```

```

E= -54.8389 eV
box:   5.663567 0 0 0   5.663567 0 0 0   5.663567
Kpoints: 6 6 6
basis: NGX= 26 NGY= 26 NGZ= 26 NGXF= 52 NGYF= 52 NGZF= 52

```

---

```

      AlN-wz  CAM-B3LYP
13      0.000000      1.789336      4.972004
13      1.549611      0.894668      2.484712
7       0.000000      1.789336      1.892919
7       1.549611      0.894668      4.380211

```

```

E= -42.2159 eV
box:   3.099221 0 0  -1.549611   2.684004 0 0 0   4.974584
Kpoints: 8 8 4
basis: NGX= 24 NGY= 24 NGZ= 36 NGXF= 48 NGYF= 48 NGZF= 72

```

---

```

      AlP-zb  CAM-B3LYP
13      0.000000      0.000000      0.000000
13      0.000000      2.729276      2.729276
13      2.729276      0.000000      2.729276
13      2.729276      2.729276      0.000000
15      1.364638      4.093914      4.093914
15      1.364638      1.364638      1.364638
15      4.093914      4.093914      1.364638
15      4.093914      1.364638      4.093914

```

```

E= -54.4228 eV
box:   5.458552 0 0 0   5.458552 0 0 0   5.458552
Kpoints: 8 8 8
basis: NGX= 24 NGY= 24 NGZ= 24 NGXF= 48 NGYF= 48 NGZF= 48

```

---

```

      BP  CAM-B3LYP
5       0.000000      0.000000      0.000000
5       0.000000      2.269041      2.269041
5       2.269041      0.000000      2.269041
5       2.269041      2.269041      0.000000
15      1.134521      1.134521      3.403562
15      1.134521      3.403562      1.134521

```

|    |          |          |          |
|----|----------|----------|----------|
| 15 | 3.403562 | 1.134521 | 1.134521 |
| 15 | 3.403562 | 3.403562 | 3.403562 |

E= -16.8536 eV

box: 4.538083 0 0 0 4.538083 0 0 0 4.538083

Kpoints: 10 10 10

basis: NGX= 24 NGY= 24 NGZ= 24 NGXf= 48 NGYf= 48 NGZf= 48

---

|     |           |          |          |
|-----|-----------|----------|----------|
| CaO | CAM-B3LYP |          |          |
| 20  | 0.000000  | 0.000000 | 0.000000 |
| 20  | 0.000000  | 2.406595 | 2.406595 |
| 20  | 2.406595  | 0.000000 | 2.406595 |
| 20  | 2.406595  | 2.406595 | 0.000000 |
| 8   | 0.000000  | 0.000000 | 2.406595 |
| 8   | 0.000000  | 2.406595 | 0.000000 |
| 8   | 2.406595  | 0.000000 | 0.000000 |
| 8   | 2.406595  | 2.406595 | 2.406595 |

E= -65.8148 eV

box: 4.813190 0 0 0 4.813190 0 0 0 4.813190

Kpoints: 10 10 10

basis: NGX= 40 NGY= 40 NGZ= 40 NGXf= 80 NGYf= 80 NGZf= 80

---

|      |           |          |          |
|------|-----------|----------|----------|
| GaAs | CAM-B3LYP |          |          |
| 31   | 0.000000  | 0.000000 | 0.000000 |
| 31   | 0.000000  | 2.828788 | 2.828788 |
| 31   | 2.828788  | 0.000000 | 2.828788 |
| 31   | 2.828788  | 2.828788 | 0.000000 |
| 33   | 1.414394  | 4.243182 | 4.243182 |
| 33   | 1.414394  | 1.414394 | 1.414394 |
| 33   | 4.243182  | 4.243182 | 1.414394 |
| 33   | 4.243182  | 1.414394 | 4.243182 |

E= -50.7180 eV

box: 5.657575 0 0 0 5.657575 0 0 0 5.657575

Kpoints: 8 8 8

basis: NGX= 32 NGY= 32 NGZ= 32 NGXf= 64 NGYf= 64 NGZf= 64

---

|        |           |          |          |
|--------|-----------|----------|----------|
| GaN-zb | CAM-B3LYP |          |          |
| 31     | 0.000000  | 0.000000 | 0.000000 |
| 31     | 0.000000  | 2.252824 | 2.252824 |
| 31     | 2.252824  | 0.000000 | 2.252824 |
| 31     | 2.252824  | 2.252824 | 0.000000 |
| 7      | 1.126412  | 3.379236 | 3.379236 |
| 7      | 1.126412  | 1.126412 | 1.126412 |
| 7      | 3.379236  | 3.379236 | 1.126412 |
| 7      | 3.379236  | 1.126412 | 3.379236 |

E= -64.5796 eV

box: 4.505647 0 0 0 4.505647 0 0 0 4.505647

Kpoints: 10 10 10

basis: NGX= 28 NGY= 28 NGZ= 28 NGXf= 56 NGYf= 56 NGZf= 56

---

|        |           |          |          |
|--------|-----------|----------|----------|
| GaP-zb | CAM-B3LYP |          |          |
| 31     | 0.000000  | 0.000000 | 0.000000 |



|    |          |          |          |
|----|----------|----------|----------|
| 31 | 0.000000 | 2.723626 | 2.723626 |
| 31 | 2.723626 | 0.000000 | 2.723626 |
| 31 | 2.723626 | 2.723626 | 0.000000 |
| 15 | 1.361813 | 4.085438 | 4.085438 |
| 15 | 1.361813 | 1.361813 | 1.361813 |
| 15 | 4.085438 | 4.085438 | 1.361813 |
| 15 | 4.085438 | 1.361813 | 4.085438 |

E= -54.7896 eV

box: 5.447251 0 0 0 5.447251 0 0 0 5.447251

Kpoints: 8 8 8

basis: NGX= 28 NGY= 28 NGZ= 28 NGXF= 56 NGYF= 56 NGZF= 56

| Ge | CAM-B3LYP |          |          |
|----|-----------|----------|----------|
| 32 | 0.000000  | 0.000000 | 2.830095 |
| 32 | 1.415047  | 1.415047 | 4.245142 |
| 32 | 0.000000  | 2.830095 | 0.000000 |
| 32 | 1.415047  | 4.245142 | 1.415047 |
| 32 | 2.830095  | 0.000000 | 0.000000 |
| 32 | 4.245142  | 1.415047 | 1.415047 |
| 32 | 2.830095  | 2.830095 | 2.830095 |
| 32 | 4.245142  | 4.245142 | 4.245142 |

E= -54.7832 eV

box: 5.660190 0 0 0 5.660190 0 0 0 5.660190

Kpoints: 8 8 8

basis: NGX= 36 NGY= 36 NGZ= 36 NGXF= 72 NGYF= 72 NGZF= 72

| InAs | CAM-B3LYP |          |          |
|------|-----------|----------|----------|
| 49   | 1.515645  | 4.546936 | 4.546936 |
| 49   | 1.515645  | 1.515645 | 1.515645 |
| 49   | 4.546936  | 4.546936 | 1.515645 |
| 49   | 4.546936  | 1.515645 | 4.546936 |
| 33   | 0.000000  | 0.000000 | 0.000000 |
| 33   | 0.000000  | 3.031291 | 3.031291 |
| 33   | 3.031291  | 0.000000 | 3.031291 |
| 33   | 3.031291  | 3.031291 | 0.000000 |

E= -48.5320 eV

box: 6.062582 0 0 0 6.062582 0 0 0 6.062582

Kpoints: 10 10 10

basis: NGX= 32 NGY= 32 NGZ= 32 NGXF= 64 NGYF= 64 NGZF= 64

| InP | CAM-B3LYP |          |          |
|-----|-----------|----------|----------|
| 49  | 0.000000  | 0.000000 | 0.000000 |
| 49  | 0.000000  | 2.937435 | 2.937435 |
| 49  | 2.937435  | 0.000000 | 2.937435 |
| 49  | 2.937435  | 2.937435 | 0.000000 |
| 15  | 1.468718  | 4.406153 | 4.406153 |
| 15  | 1.468718  | 1.468718 | 1.468718 |
| 15  | 4.406153  | 4.406153 | 1.468718 |
| 15  | 4.406153  | 1.468718 | 4.406153 |

E= -52.6509 eV

box: 5.874871 0 0 0 5.874871 0 0 0 5.874871

Kpoints: 6 6 6

basis: NGX= 26 NGY= 26 NGZ= 26 NGXF= 52 NGYF= 52 NGZF= 52

---

```

LiCl  CAM-B3LYP
3      0.000000    0.000000    0.000000
3      0.000000    2.533431    2.533431
3      2.533431    0.000000    2.533431
3      2.533431    2.533431    0.000000
17     0.000000    0.000000    2.533431
17     0.000000    2.533431    0.000000
17     2.533431    0.000000    0.000000
17     2.533431    2.533431    2.533431

E= -43.1803 eV
box:   5.066862 0 0 0   5.066862 0 0 0   5.066862
Kpoints: 6 6 6
basis: NGX= 28 NGY= 28 NGZ= 28 NGXf= 56 NGYf= 56 NGZf= 56

```

---

```

LiF  CAM-B3LYP
3      0.000000    0.000000    0.000000
3      0.000000    1.983998    1.983998
3      1.983998    0.000000    1.983998
3      1.983998    1.983998    0.000000
9      0.000000    0.000000    1.983998
9      0.000000    1.983998    0.000000
9      1.983998    0.000000    0.000000
9      1.983998    1.983998    1.983998

E= -55.4773 eV
box:   3.967996 0 0 0   3.967996 0 0 0   3.967996
Kpoints: 8 8 8
basis: NGX= 28 NGY= 28 NGZ= 28 NGXf= 56 NGYf= 56 NGZf= 56

```

---

```

SiC  CAM-B3LYP
14     0.000000    2.173588    2.173588
14     0.000000    0.000000    0.000000
14     2.173588    2.173588    0.000000
14     2.173588    0.000000    2.173588
6      3.260382    3.260382    3.260382
6      3.260382    1.086794    1.086794
6      1.086794    3.260382    1.086794
6      1.086794    1.086794    3.260382

E= -84.7238 eV
box:   4.347176 0 0 0   4.347176 0 0 0   4.347176
Kpoints: 6 6 6
basis: NGX= 32 NGY= 32 NGZ= 32 NGXf= 66 NGYf= 66 NGZf= 66

```

---

```

SiO2  CAM-B3LYP
14     2.568117    0.000000    0.911771
14     -1.284059    2.224055    4.558855
14     1.170619    2.027572    2.735313
8      -0.804377    3.558239    5.273288
8      1.029036    3.169118    1.626204
8      -0.224659    1.775897    3.449746
8      1.650301    0.693388    2.020880
8      2.230019    2.475730    3.844422

```

```

      8      3.483714      1.082509      0.197338

E= -108.8484 eV
box:   4.909356 0 0 -2.454678   4.251627 0 0 0   5.470626
Kpoints: 9 9 5
basis: NGX= 30 NGY= 30 NGZ= 32 NGXF= 60 NGYF= 60 NGZF= 64

```

---

```

Si B3LYP
14      1.368089      1.368089      4.104267
14      0.000000      0.000000      2.736178
14      1.368089      4.104267      1.368089
14      0.000000      2.736178      0.000000
14      4.104267      1.368089      1.368089
14      2.736178      0.000000      0.000000
14      4.104267      4.104267      4.104267
14      2.736178      2.736178      2.736178

```

```

E= -47.3008 eV
box:   5.472356 0 0 0   5.472356 0 0 0   5.472356
Kpoints: 12 12 12
basis: NGX= 24 NGY= 24 NGZ= 24 NGXF= 48 NGYF= 48 NGZF= 48

```

---

```

NaCl B3LYP
11      0.000000      0.000000      0.000000
11      0.000000      2.835111      2.835111
11      2.835111      0.000000      2.835111
11      2.835111      2.835111      0.000000
17      0.000000      0.000000      2.835111
17      0.000000      2.835111      0.000000
17      2.835111      0.000000      0.000000
17      2.835111      2.835111      2.835111

```

```

E= -31.1417 eV
box:   5.670222 0 0 0   5.670222 0 0 0   5.670222
Kpoints: 12 12 12
basis: NGX= 24 NGY= 24 NGZ= 24 NGXF= 48 NGYF= 48 NGZF= 48

```

---

```

MgO B3LYP
12      0.000000      0.000000      0.000000
12      0.000000      2.103380      2.103380
12      2.103380      0.000000      2.103380
12      2.103380      2.103380      0.000000
8       0.000000      0.000000      2.103380
8       0.000000      2.103380      0.000000
8       2.103380      0.000000      0.000000
8       2.103380      2.103380      2.103380

```

```

E= -55.3269 eV
box:   4.206761 0 0 0   4.206761 0 0 0   4.206761
Kpoints: 12 12 12
basis: NGX= 24 NGY= 24 NGZ= 24 NGXF= 48 NGYF= 48 NGZF= 48

```

---

```

h-BN B3LYP
7       1.246446      1.439280      4.947575
7       0.000000      0.719628      1.649192

```

|   |          |          |          |
|---|----------|----------|----------|
| 7 | 0.000000 | 3.598189 | 4.947575 |
| 7 | 1.246446 | 2.878537 | 1.649192 |
| 5 | 0.000000 | 0.719627 | 4.947575 |
| 5 | 1.246446 | 1.439281 | 1.649192 |
| 5 | 1.246446 | 2.878536 | 4.947575 |
| 5 | 0.000000 | 3.598190 | 1.649192 |

E= -40.1372 eV  
 box: 2.492893 0 0 0 4.317817 0 0 0 6.596766  
 Kpoints: 12 12 4  
 basis: NGX= 24 NGY= 24 NGZ= 64 NGXF= 48 NGYF= 48 NGZF= 128

---

diamond B3LYP

|   |          |          |          |
|---|----------|----------|----------|
| 6 | 0.000000 | 0.000000 | 0.000000 |
| 6 | 0.889814 | 2.669441 | 2.669441 |
| 6 | 0.000000 | 1.779627 | 1.779627 |
| 6 | 0.889814 | 0.889814 | 0.889814 |
| 6 | 1.779627 | 0.000000 | 1.779627 |
| 6 | 2.669441 | 2.669441 | 0.889814 |
| 6 | 1.779627 | 1.779627 | 0.000000 |
| 6 | 2.669441 | 0.889814 | 2.669441 |

E= -79.9622 eV  
 box: 3.559254 0 0 0 3.559254 0 0 0 3.559254  
 Kpoints: 12 12 12  
 basis: NGX= 24 NGY= 24 NGZ= 24 NGXF= 48 NGYF= 48 NGZF= 48

---
